# Supplementary material for: Stereochemical preference of yeast epoxide hydrolase for the O-axial C3 epimers of 1-oxaspiro[2.5]octanes
Source: Royal Society of Chemistry journal article supplement (doi:10.1039/b709742e), 2007-01-01
Supplement: b709742e.pdf [file b709742e.pdf]

Supplementary Information For:

**Stereochemical preference of yeast epoxide hydrolase  
for the *O*-axial C3 epimers of 1-oxaspiro[2.5]octanes**

Carel A.G.M. Weijers, Paul M. Könst,  
Maurice C.R. Franssen\* and Ernst J.R. Sudhölter

Laboratory of Organic Chemistry, Wageningen University,  
Dreijenplein 8, 6703HB Wageningen, The Netherlands.

Table of contents

|     |                                                       |
|-----|-------------------------------------------------------|
| S2  | <sup>1</sup> H NMR of substrate <b>1a/2a</b>          |
| S3  | <sup>13</sup> C NMR of substrate <b>1a/2a</b>         |
| S4  | <sup>1</sup> H NMR of $\beta$ -bromohydrin <b>4b</b>  |
| S5  | <sup>13</sup> C NMR of $\beta$ -bromohydrin <b>4b</b> |
| S6  | <sup>1</sup> H NMR of substrate <b>1b</b>             |
| S7  | <sup>13</sup> C NMR of substrate <b>1b</b>            |
| S8  | <sup>1</sup> H NMR of $\beta$ -bromohydrin <b>5b</b>  |
| S9  | <sup>13</sup> C NMR of $\beta$ -bromohydrin <b>5b</b> |
| S10 | <sup>1</sup> H NMR of substrate <b>2b</b>             |
| S11 | <sup>13</sup> C NMR of substrate <b>2b</b>            |
| S12 | <sup>1</sup> H NMR of $\beta$ -bromohydrin <b>4c</b>  |
| S13 | <sup>13</sup> C NMR of $\beta$ -bromohydrin <b>4c</b> |
| S14 | <sup>1</sup> H NMR of substrate <b>1c</b>             |
| S15 | <sup>13</sup> C NMR of substrate <b>1c</b>            |
| S16 | <sup>1</sup> H NMR of $\beta$ -bromohydrin <b>5c</b>  |
| S17 | <sup>13</sup> C NMR of $\beta$ -bromohydrin <b>5c</b> |
| S18 | <sup>1</sup> H NMR of substrate <b>2c</b>             |
| S19 | <sup>13</sup> C NMR of substrate <b>2c</b>            |
| S20 | <sup>1</sup> H NMR of ketone <i>cis</i> - <b>3d</b>   |
| S21 | <sup>13</sup> C NMR of ketone <i>cis</i> - <b>3d</b>  |
| S22 | <sup>1</sup> H NMR of $\beta$ -bromohydrin <b>4d</b>  |
| S23 | <sup>13</sup> C NMR of $\beta$ -bromohydrin <b>4d</b> |
| S24 | <sup>1</sup> H NMR of substrate <b>1d</b>             |
| S25 | <sup>13</sup> C NMR of substrate <b>1d</b>            |
| S26 | <sup>1</sup> H NMR of $\beta$ -bromohydrin <b>5d</b>  |
| S27 | <sup>13</sup> C NMR of $\beta$ -bromohydrin <b>5d</b> |
| S28 | <sup>1</sup> H NMR of substrate <b>2d</b>             |
| S29 | <sup>13</sup> C NMR of substrate <b>2d</b>            |
| S30 | <sup>1</sup> H NMR of $\beta$ -bromohydrin <b>4e</b>  |
| S31 | <sup>13</sup> C NMR of $\beta$ -bromohydrin <b>4e</b> |
| S32 | <sup>1</sup> H NMR of substrate <b>1e</b>             |
| S33 | <sup>13</sup> C NMR of substrate <b>1e</b>            |
| S34 | <sup>13</sup> C NMR of substrate <b>2e</b>            |
| S35 | Table S1, conditions GC analysis                      |

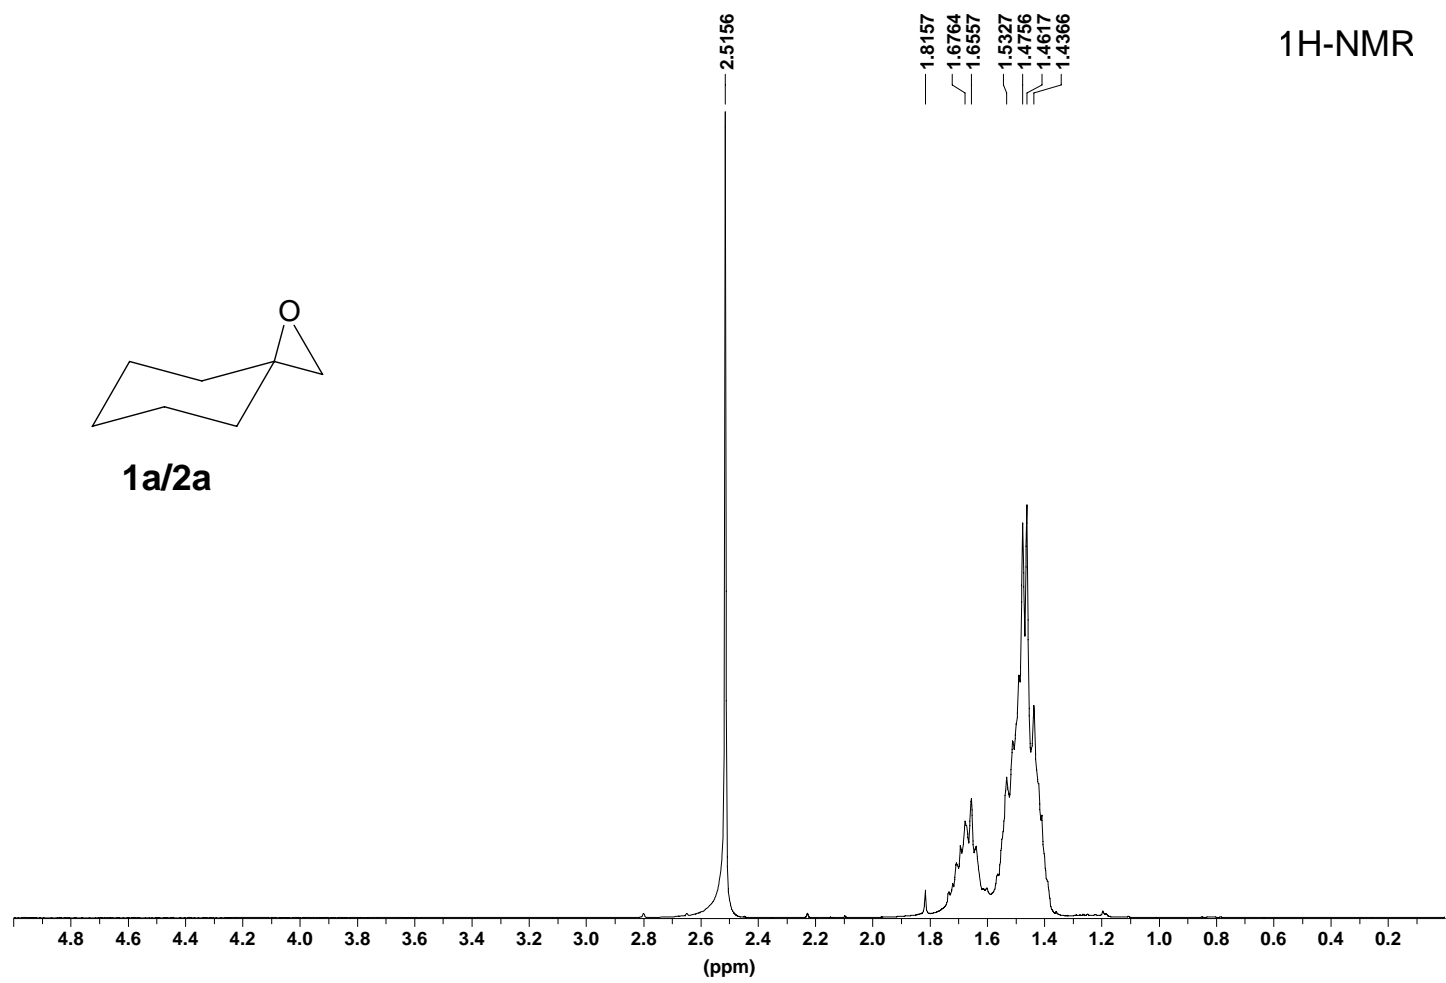

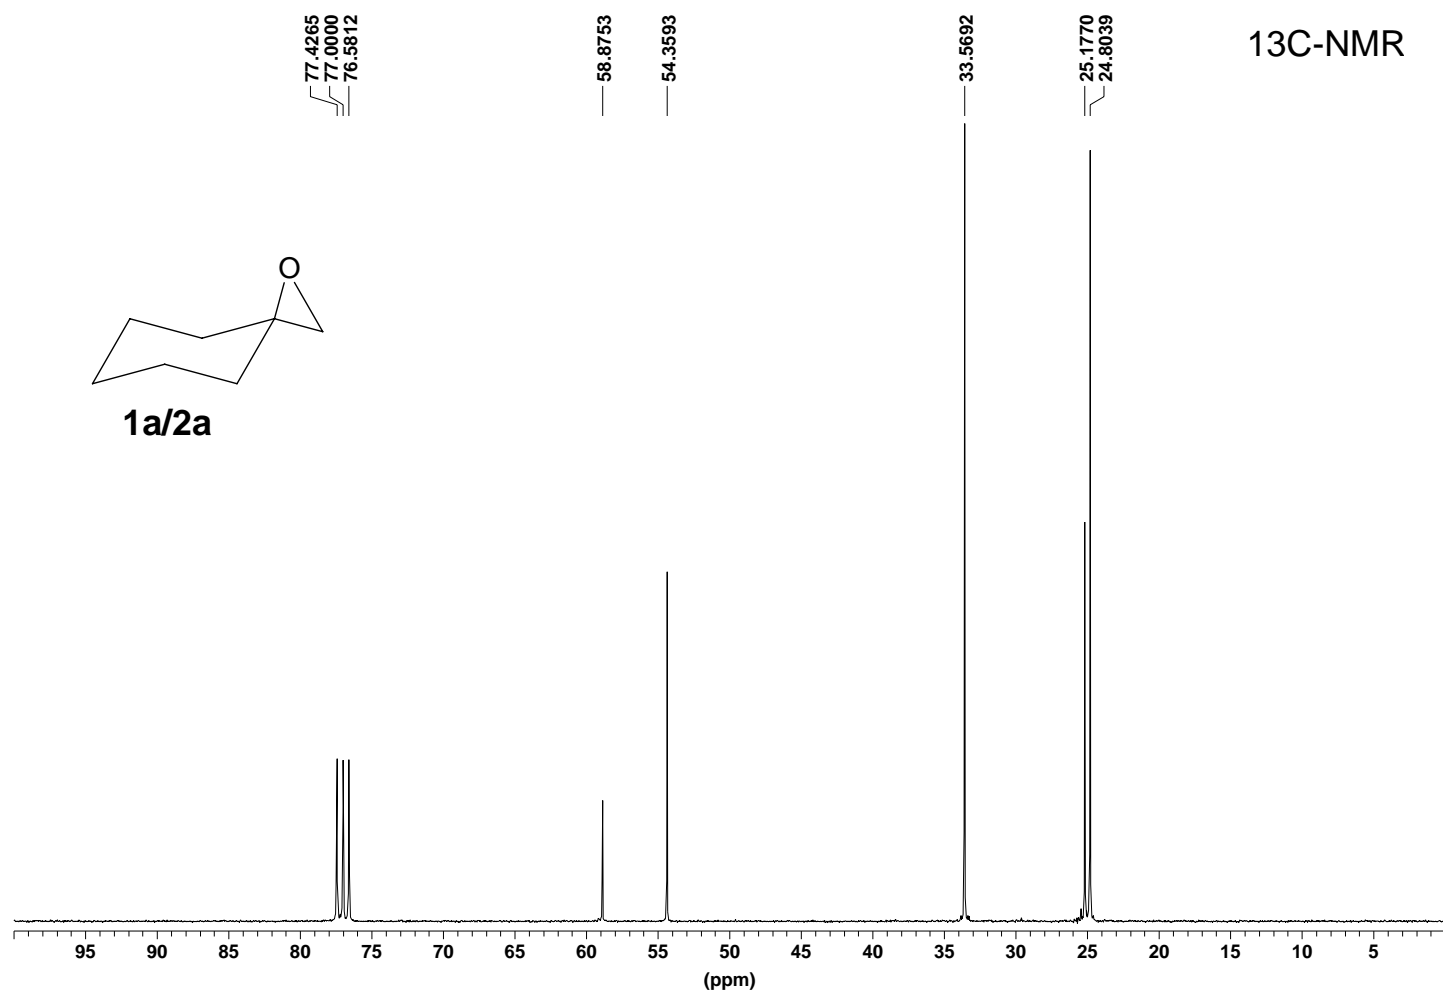

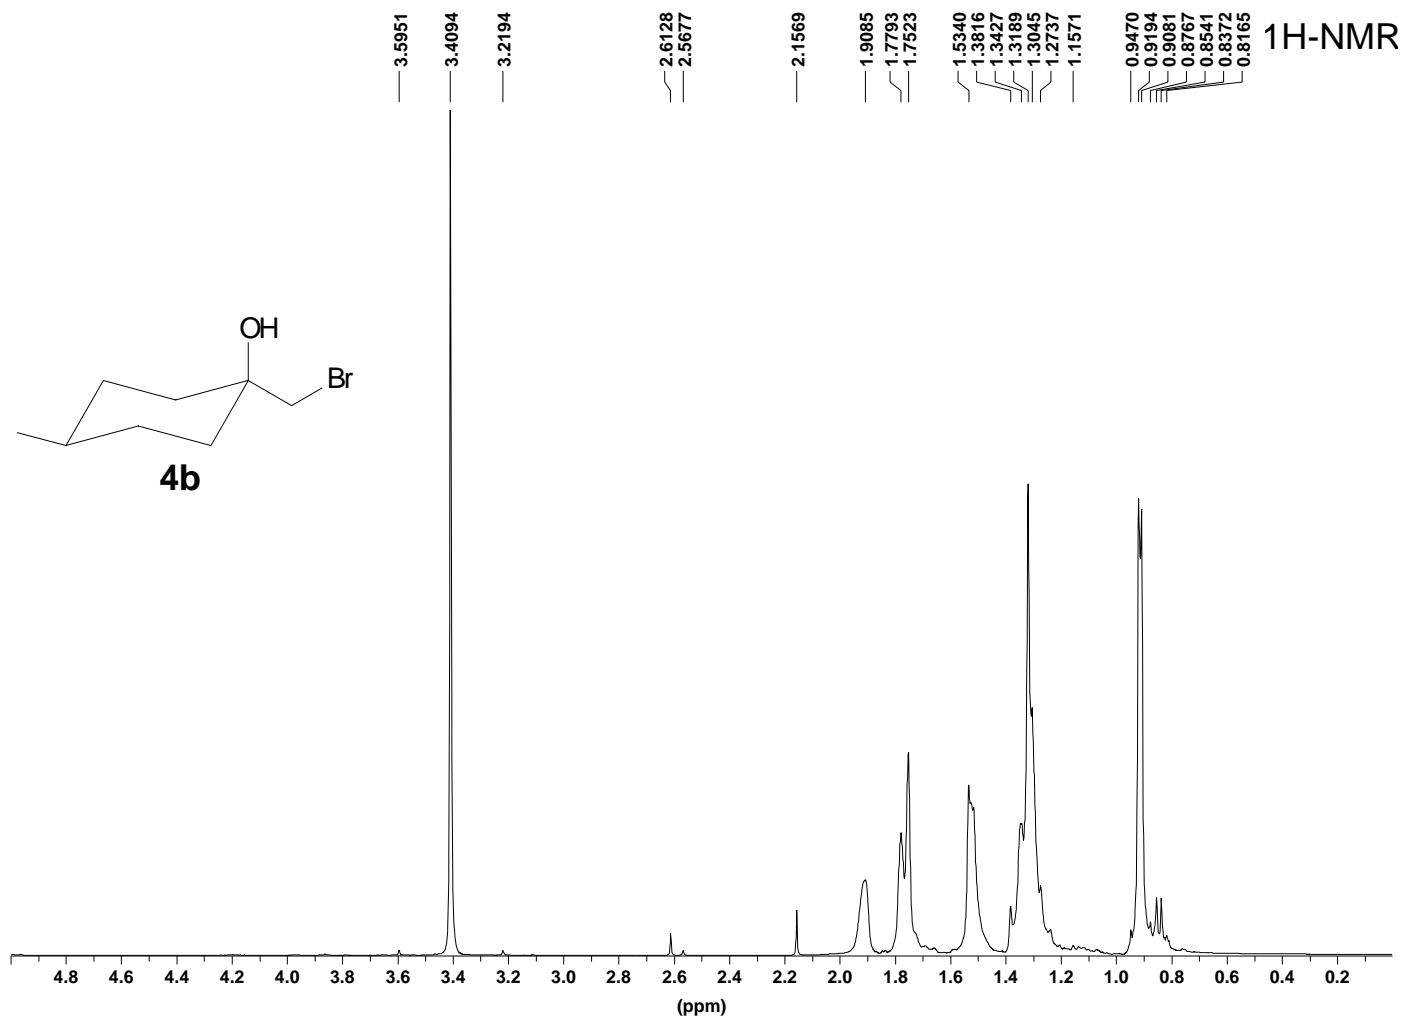

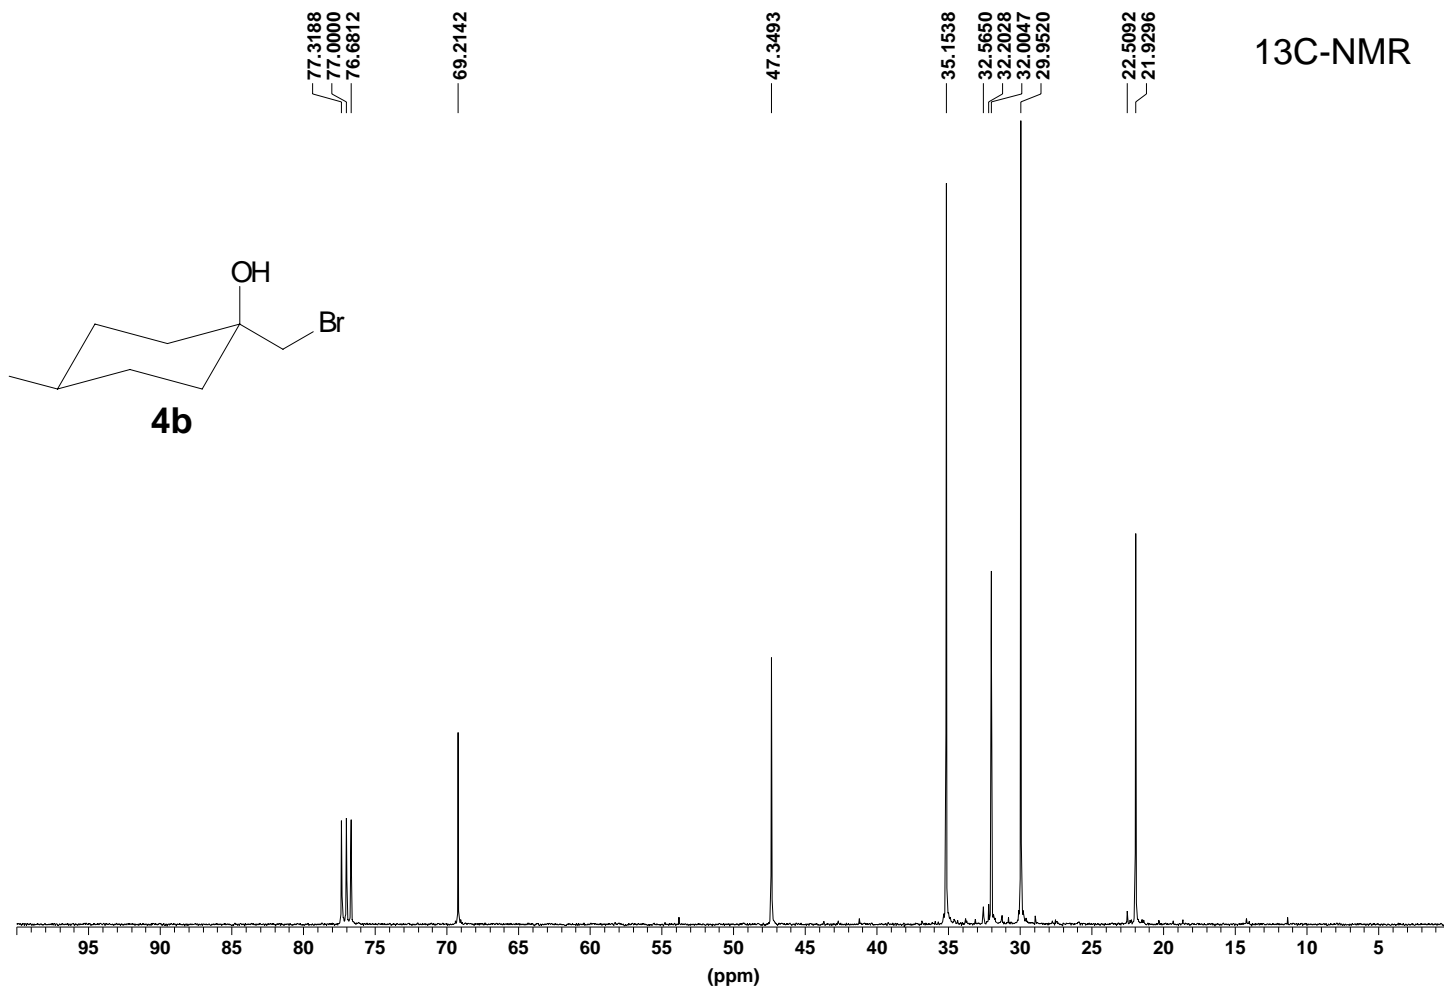

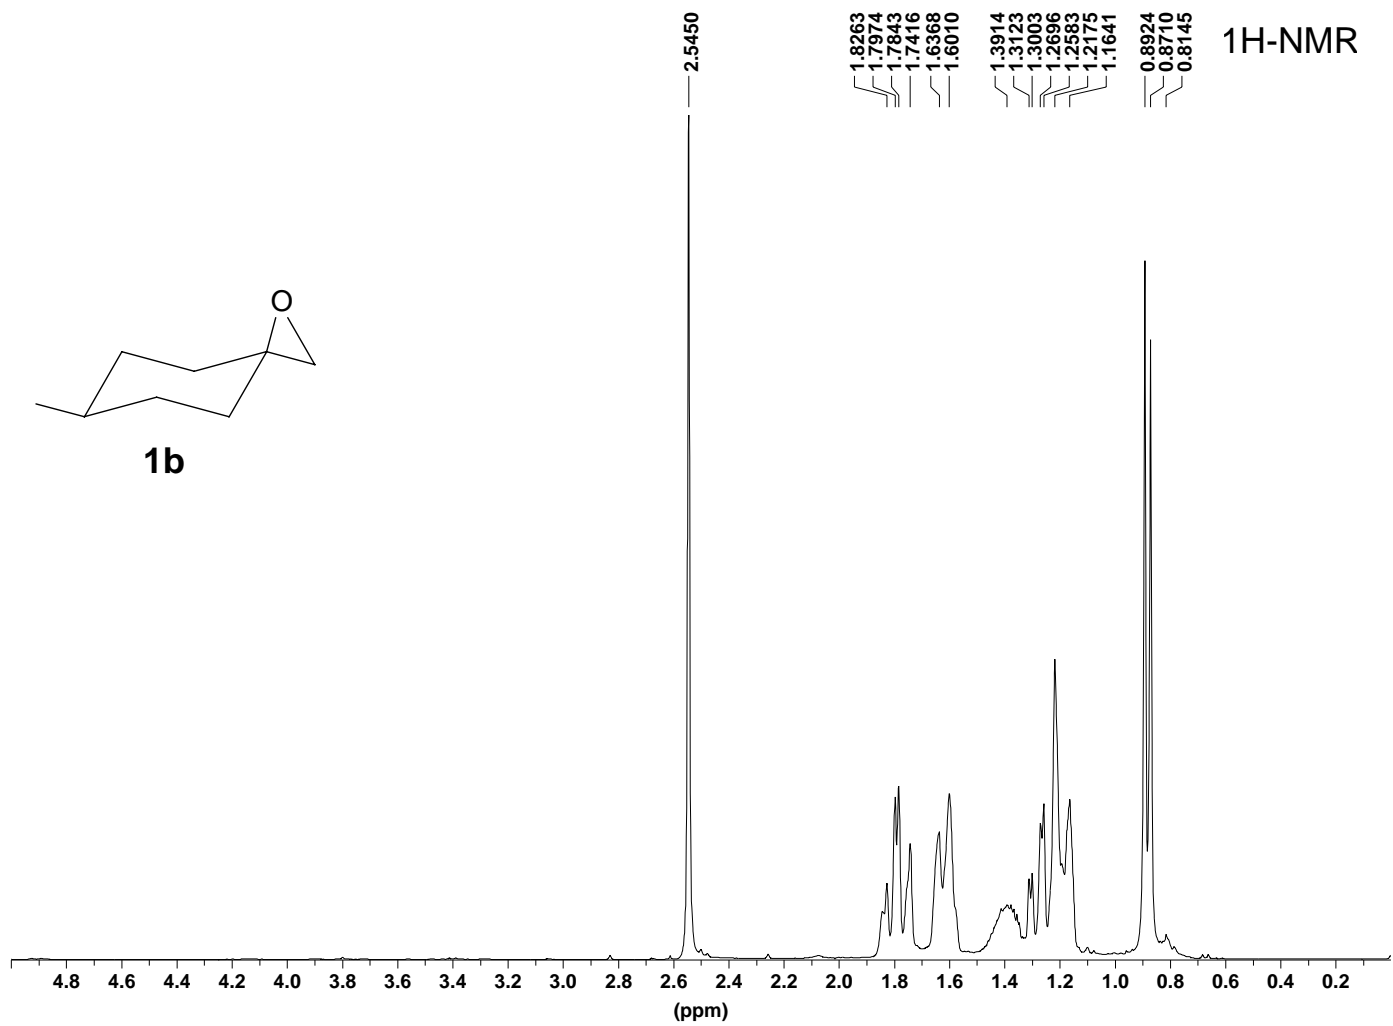

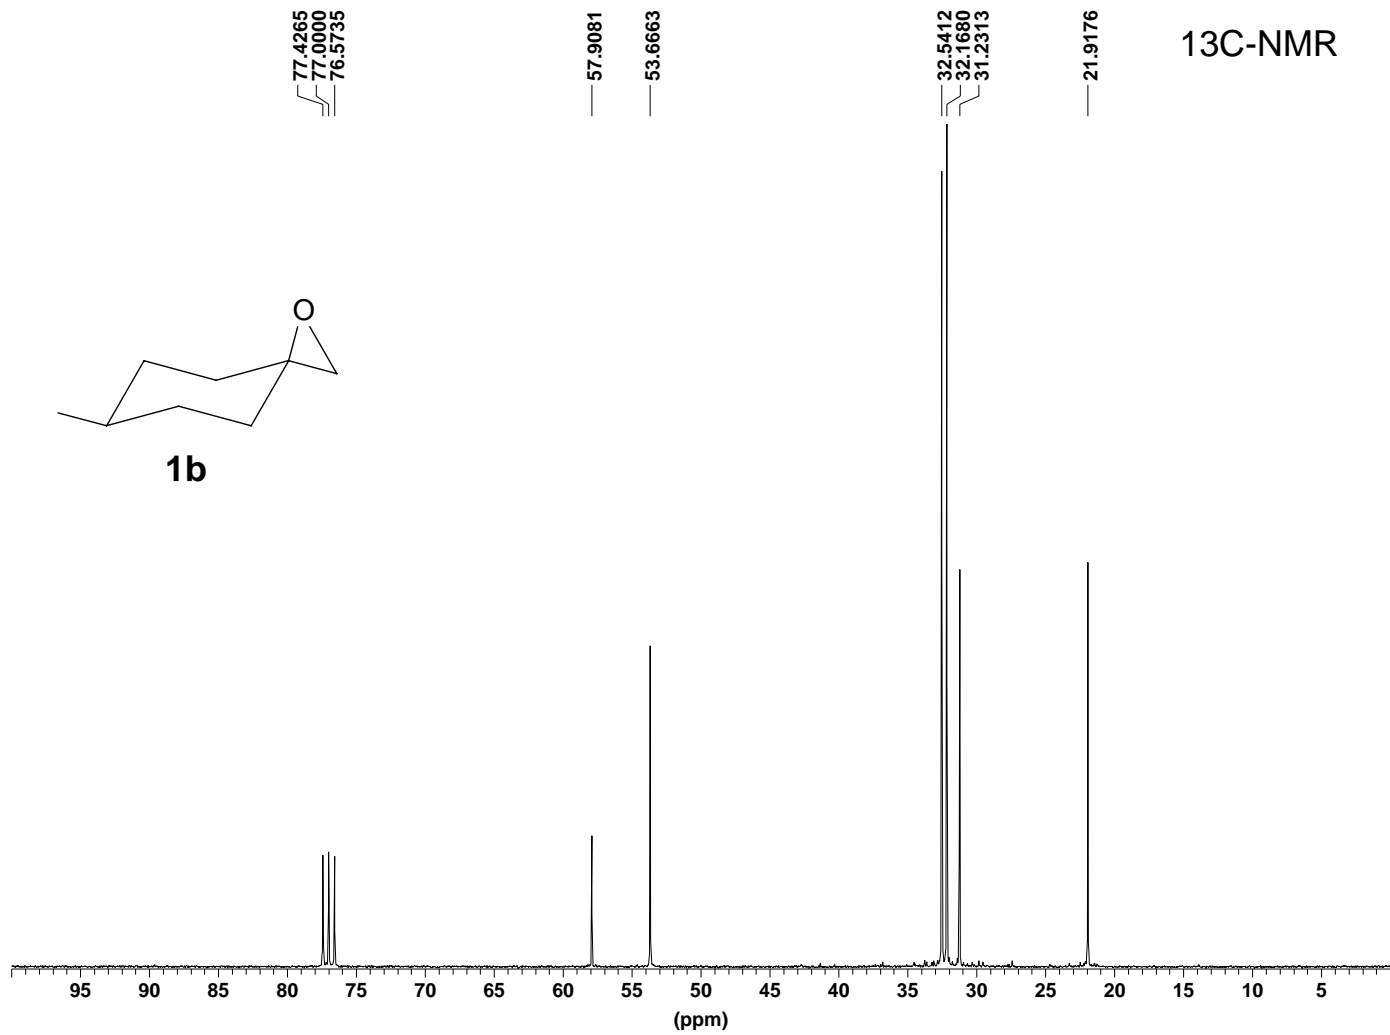

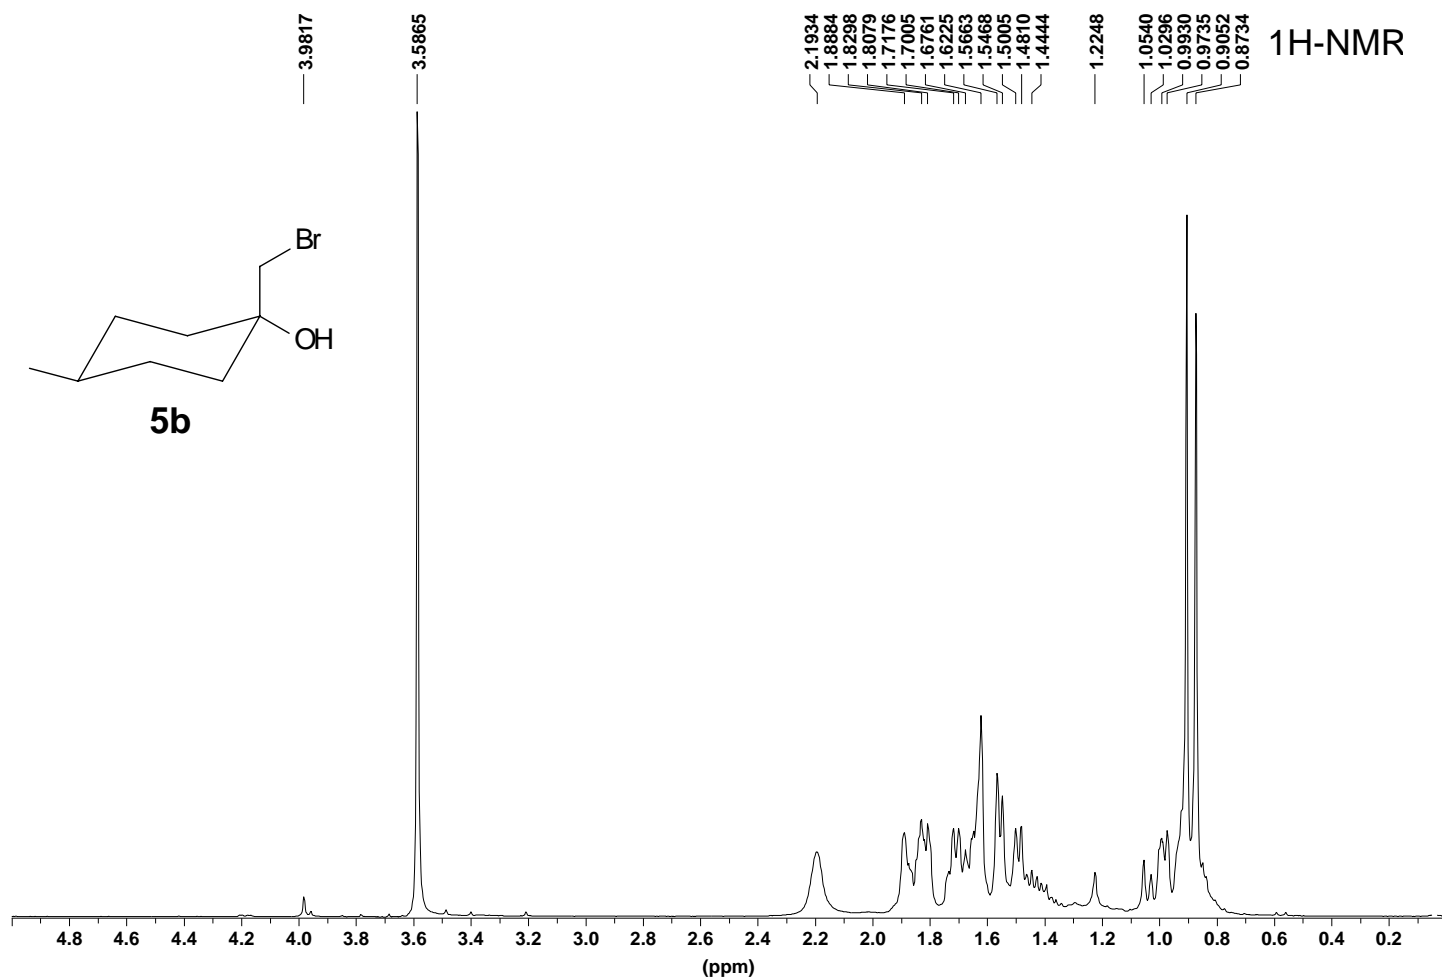



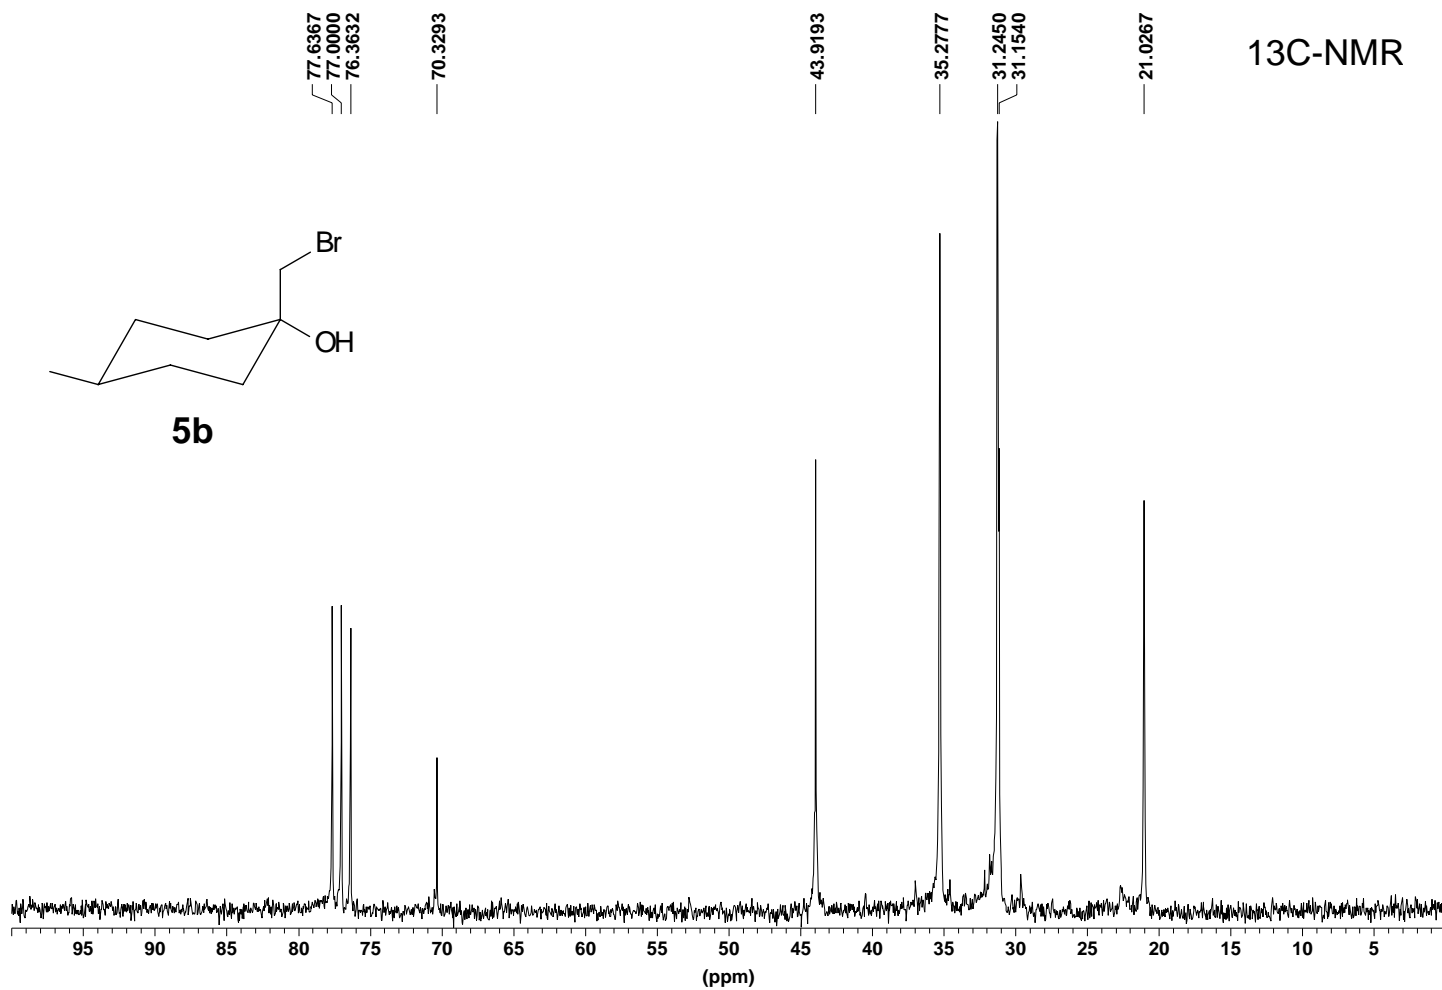

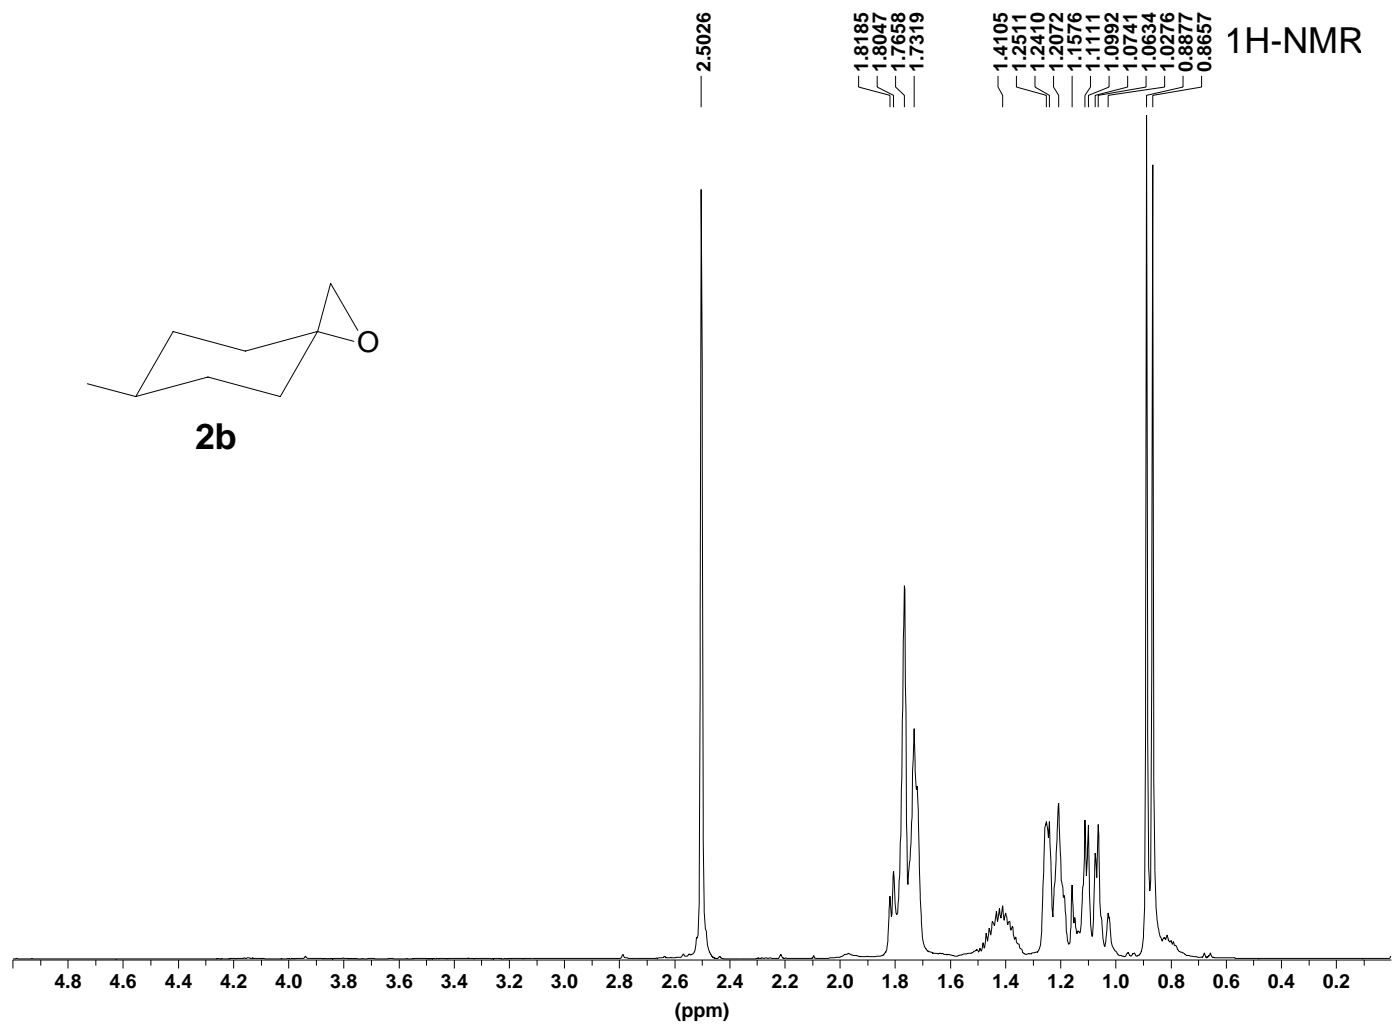

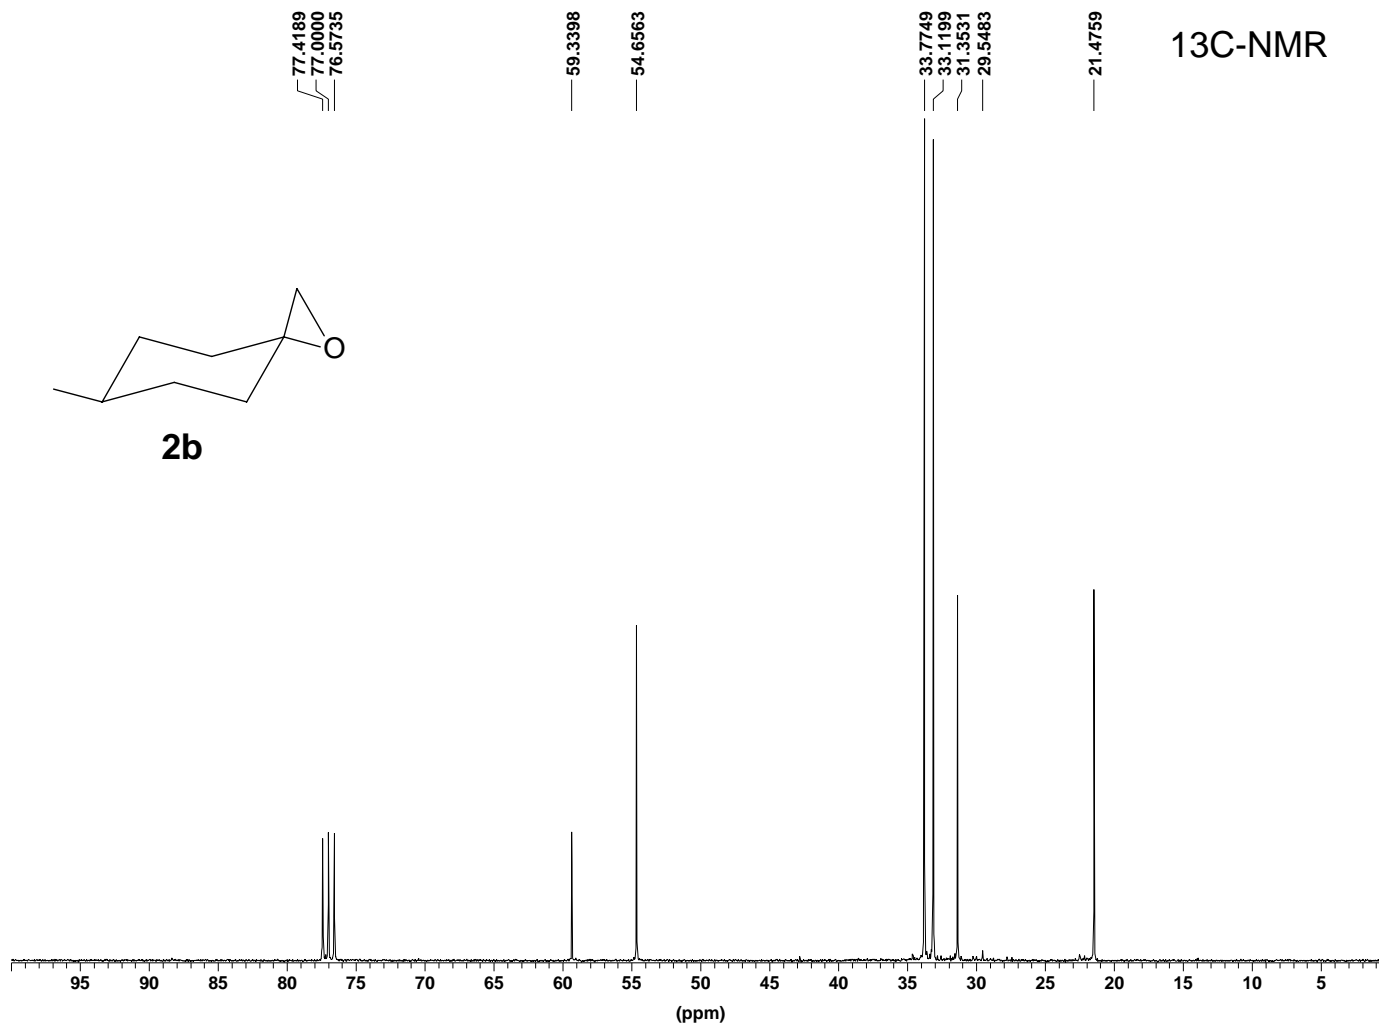

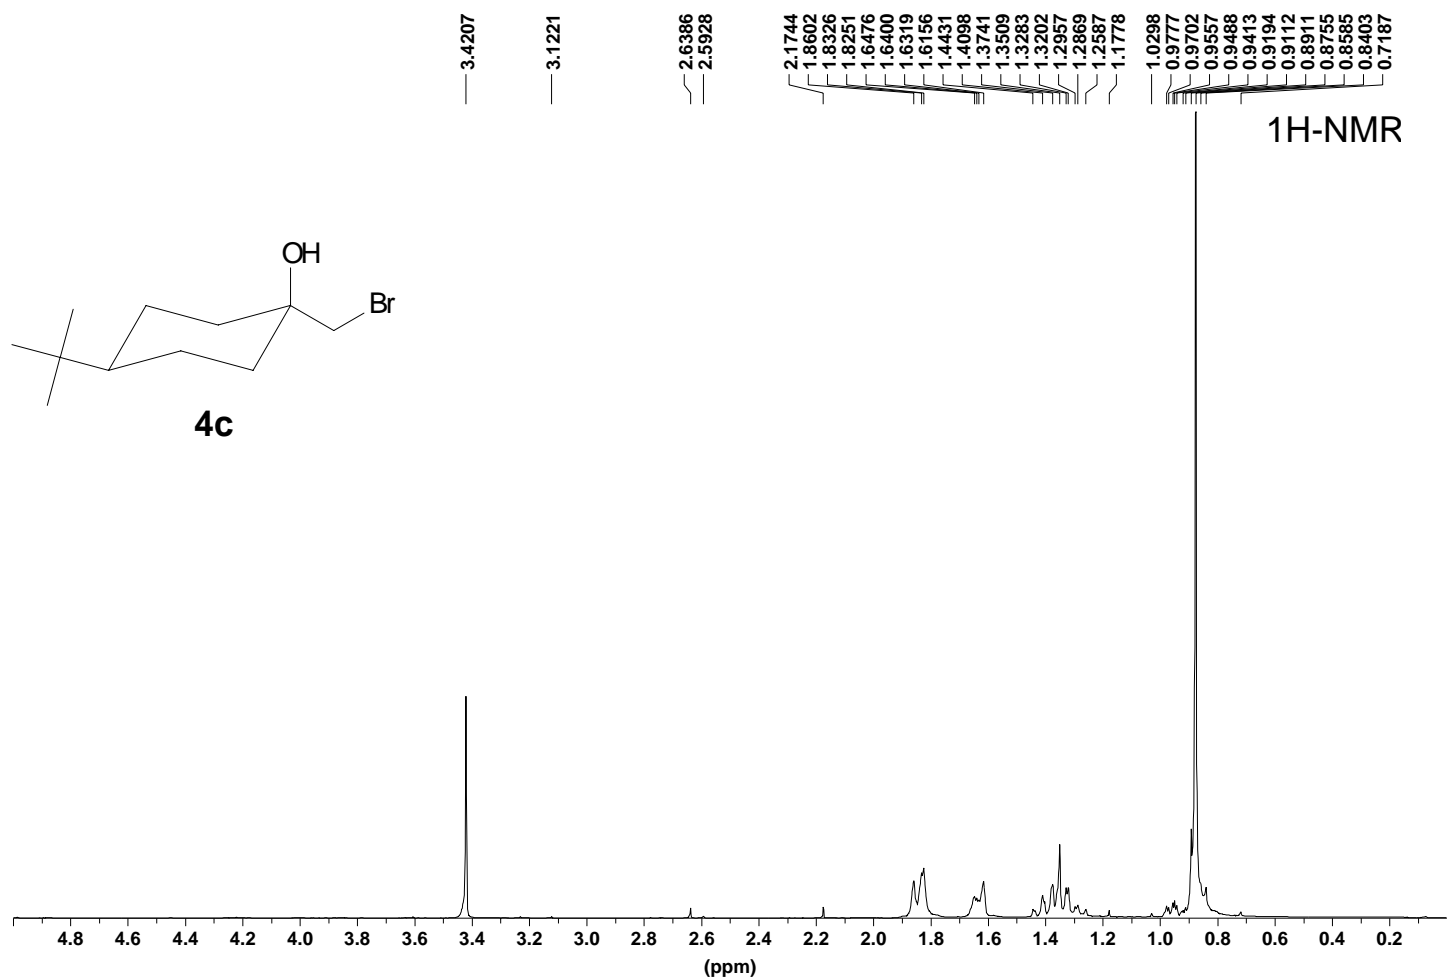

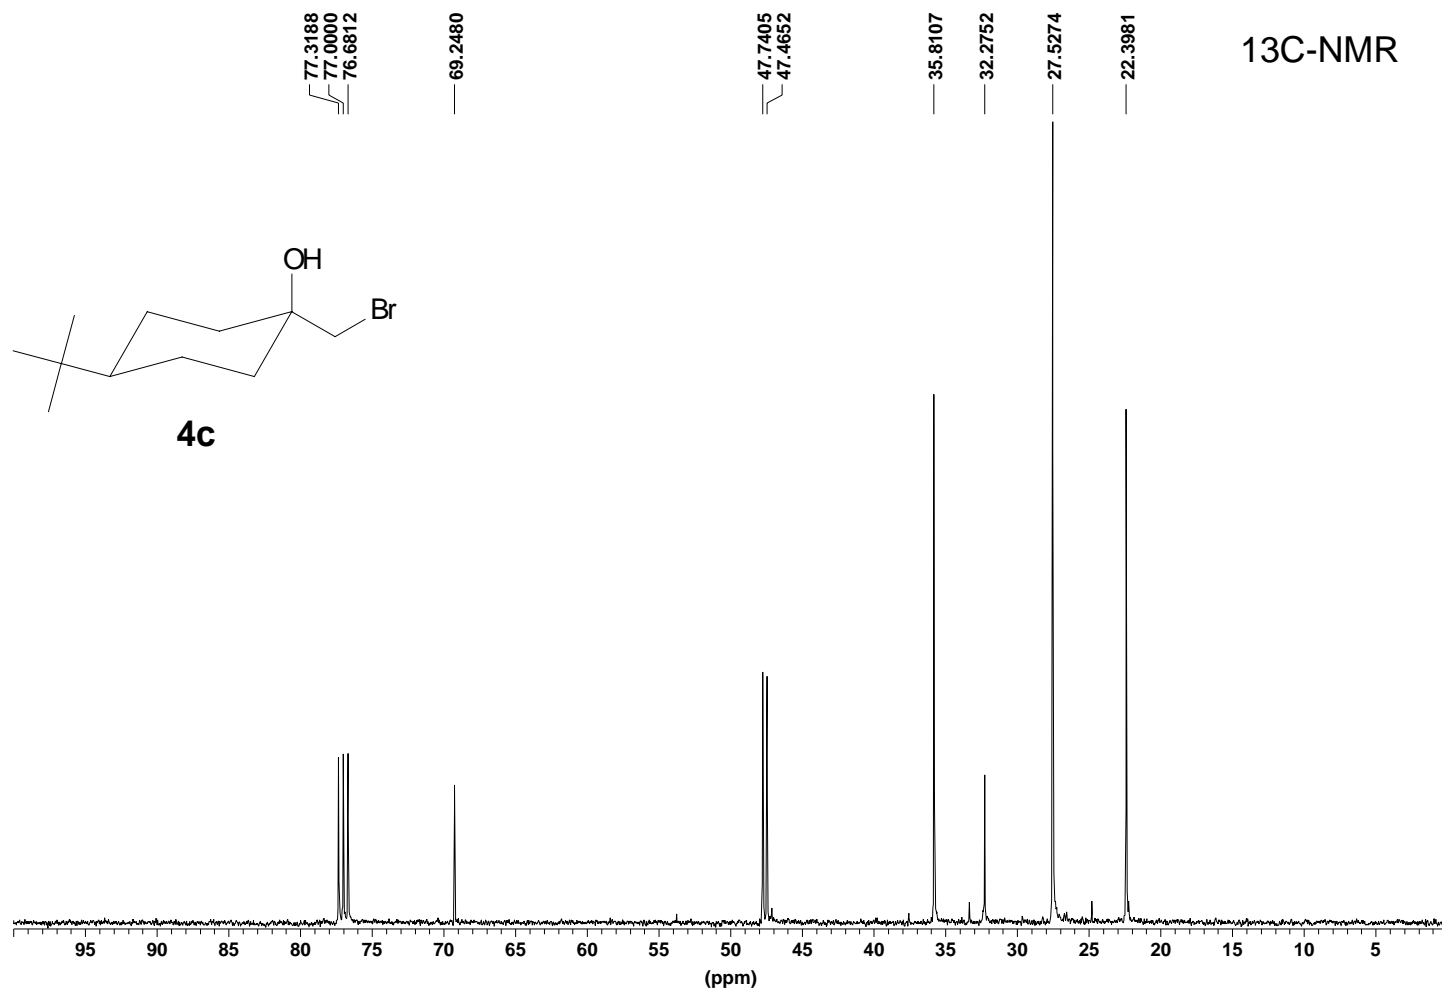

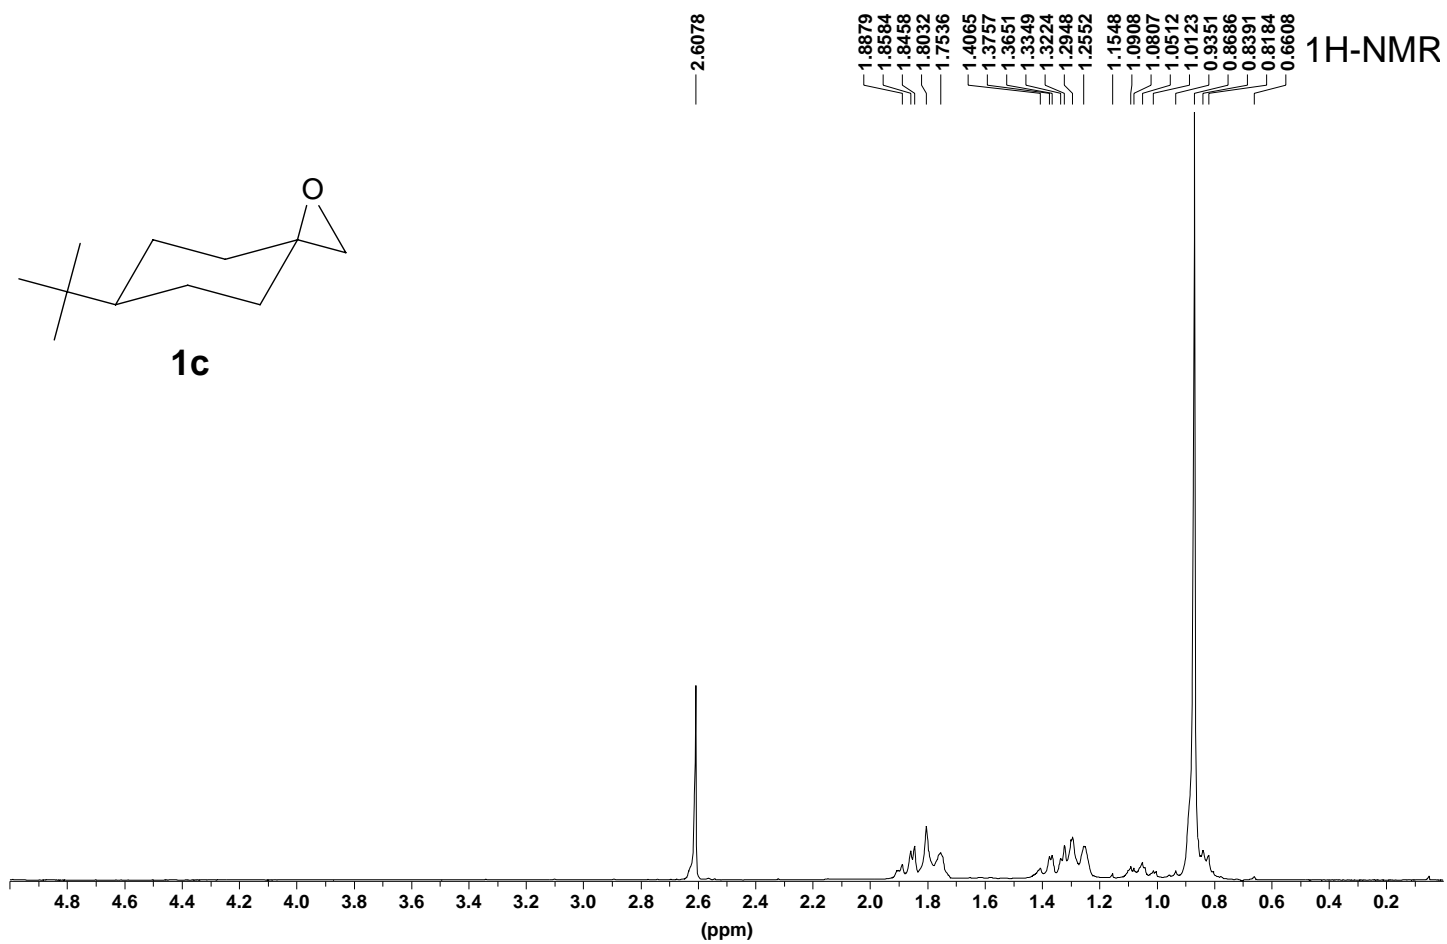

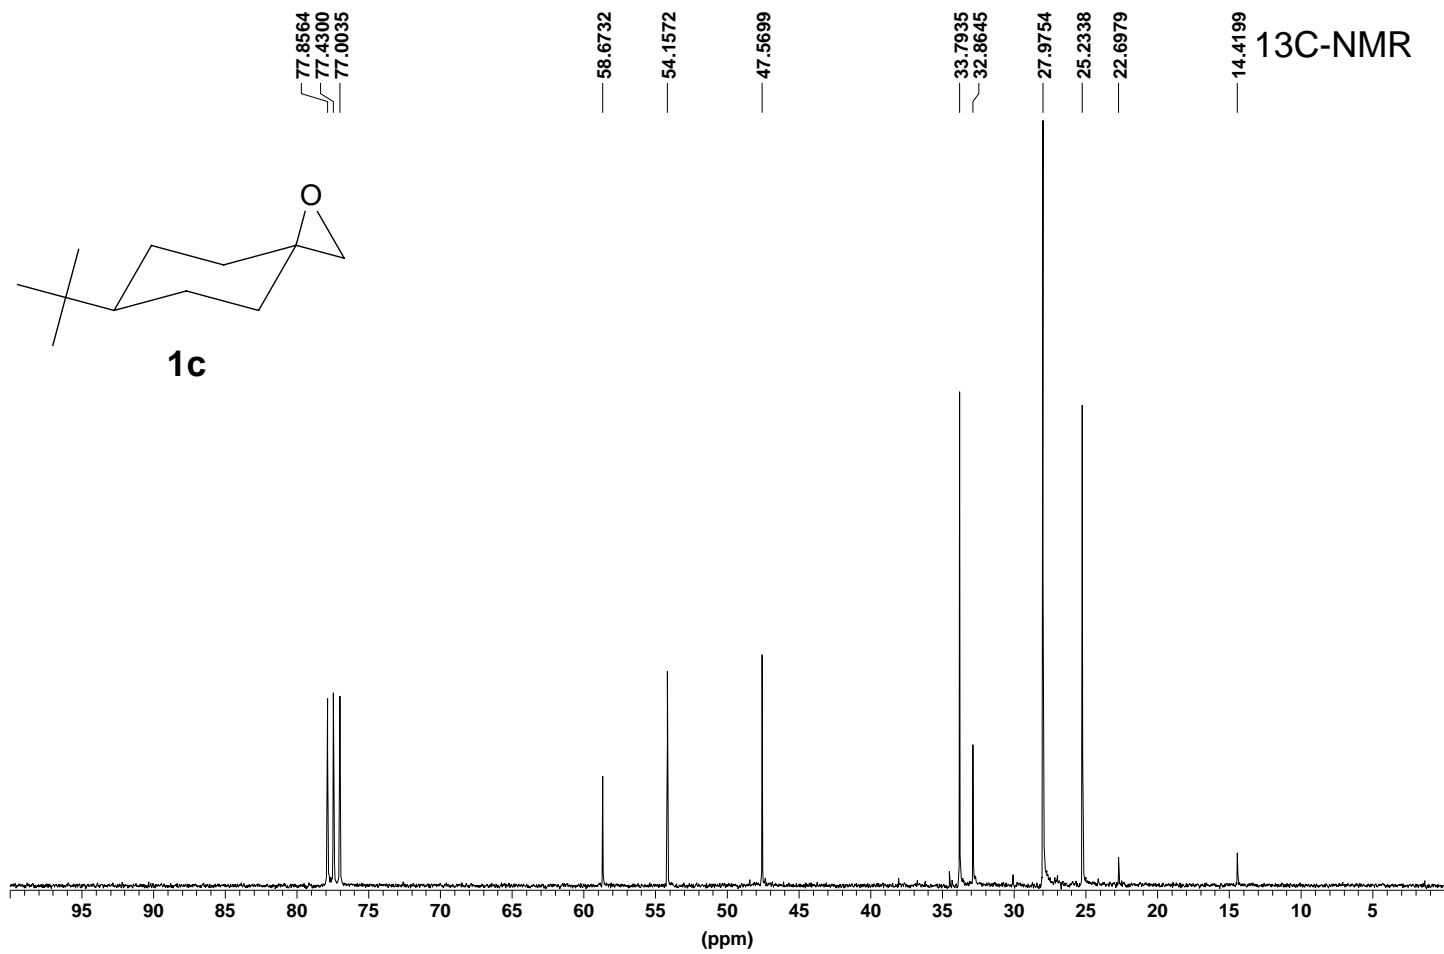

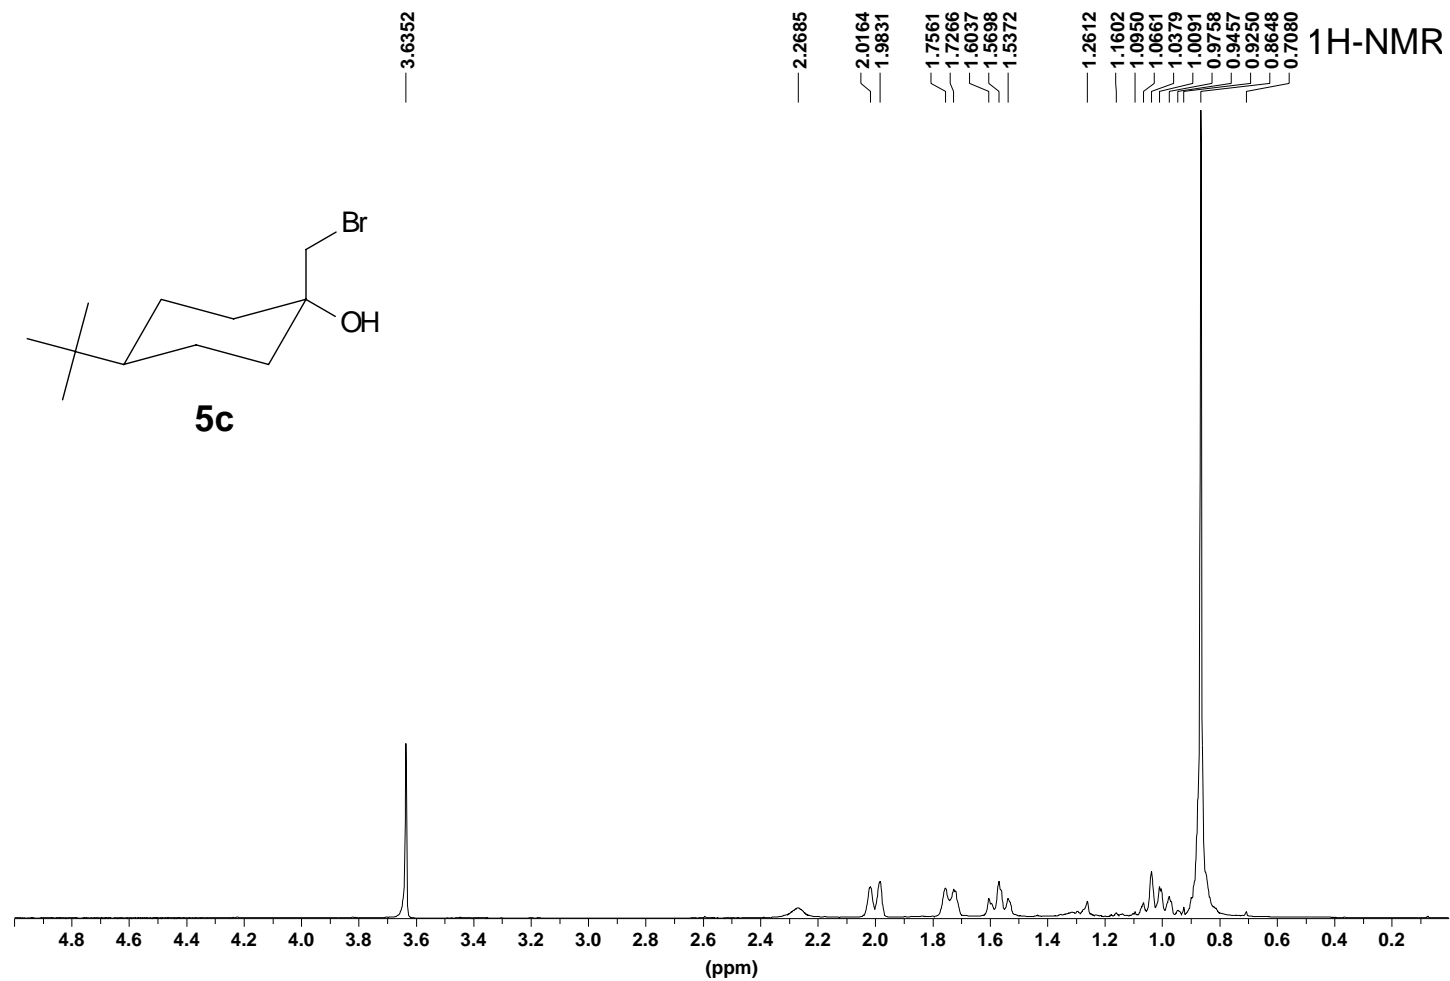



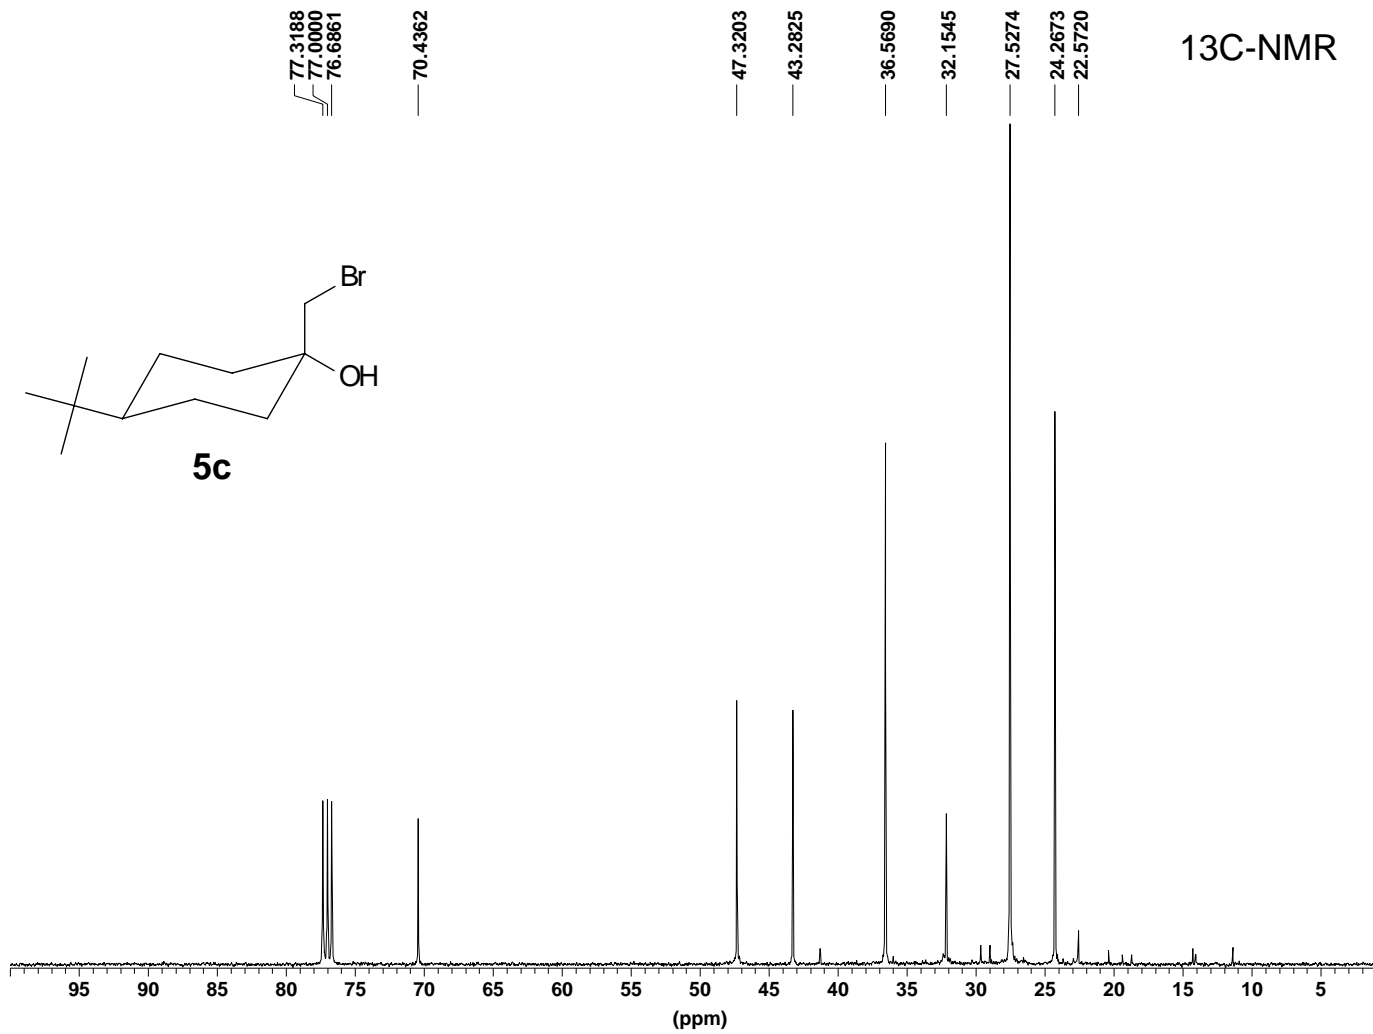

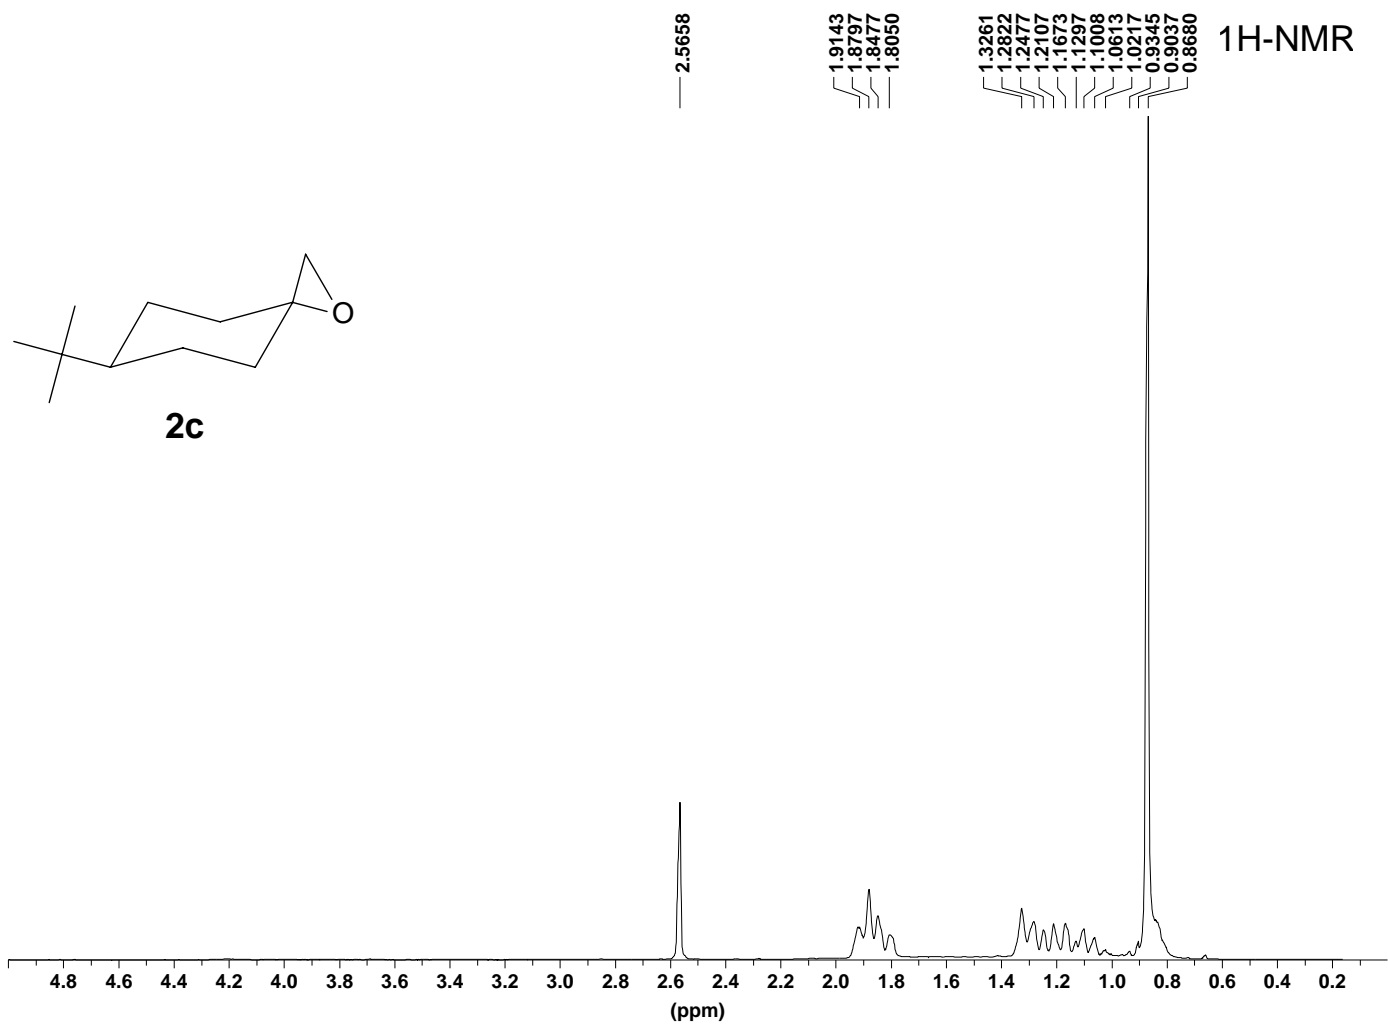

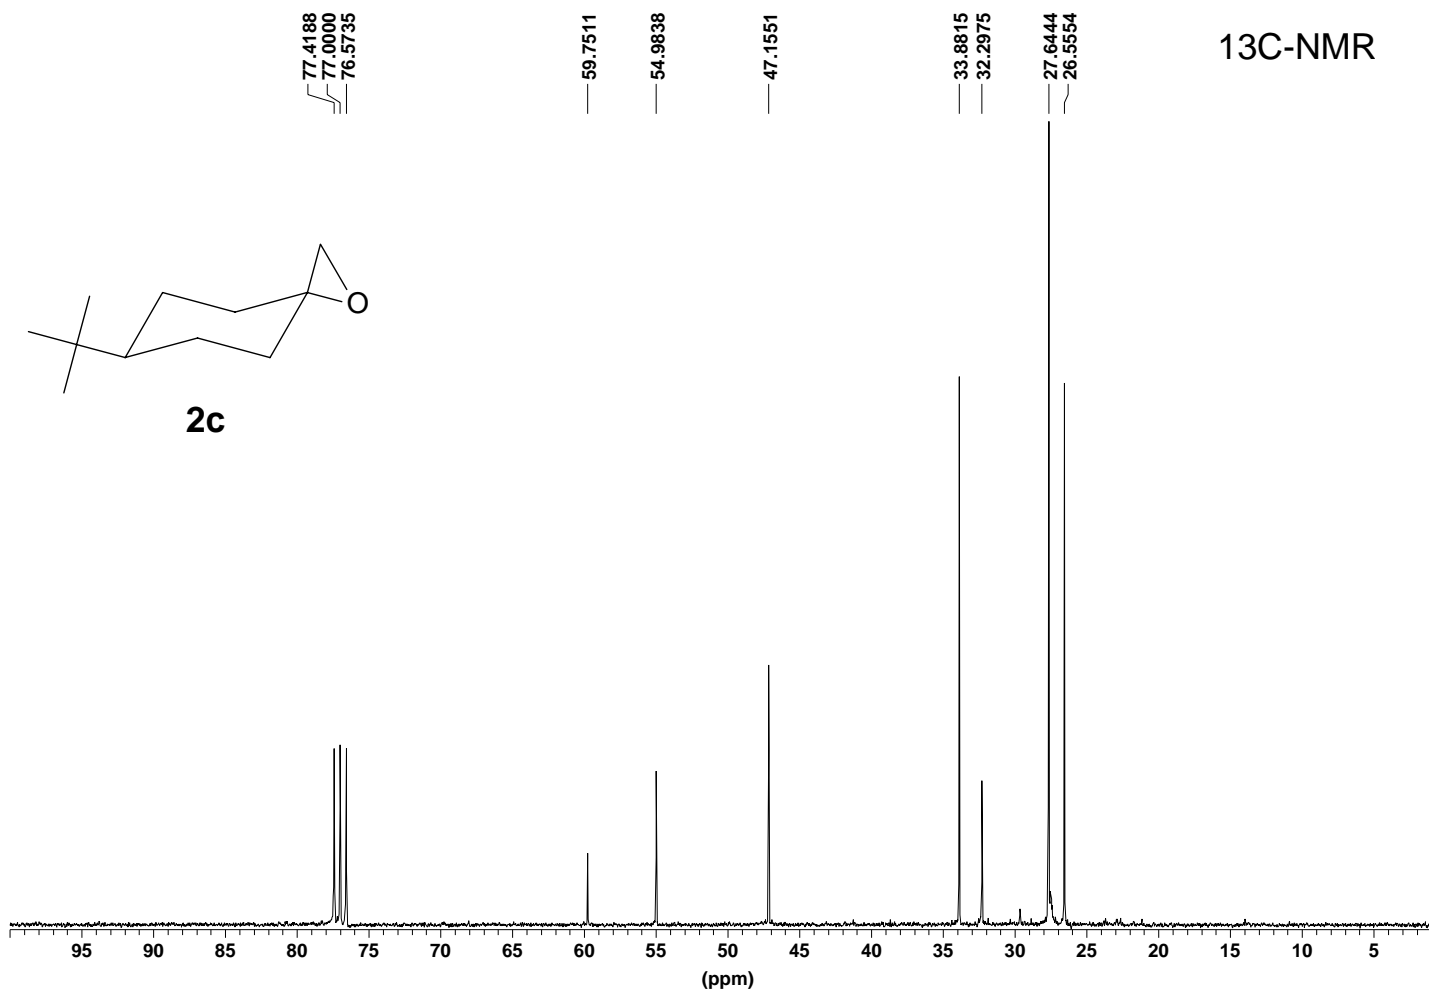

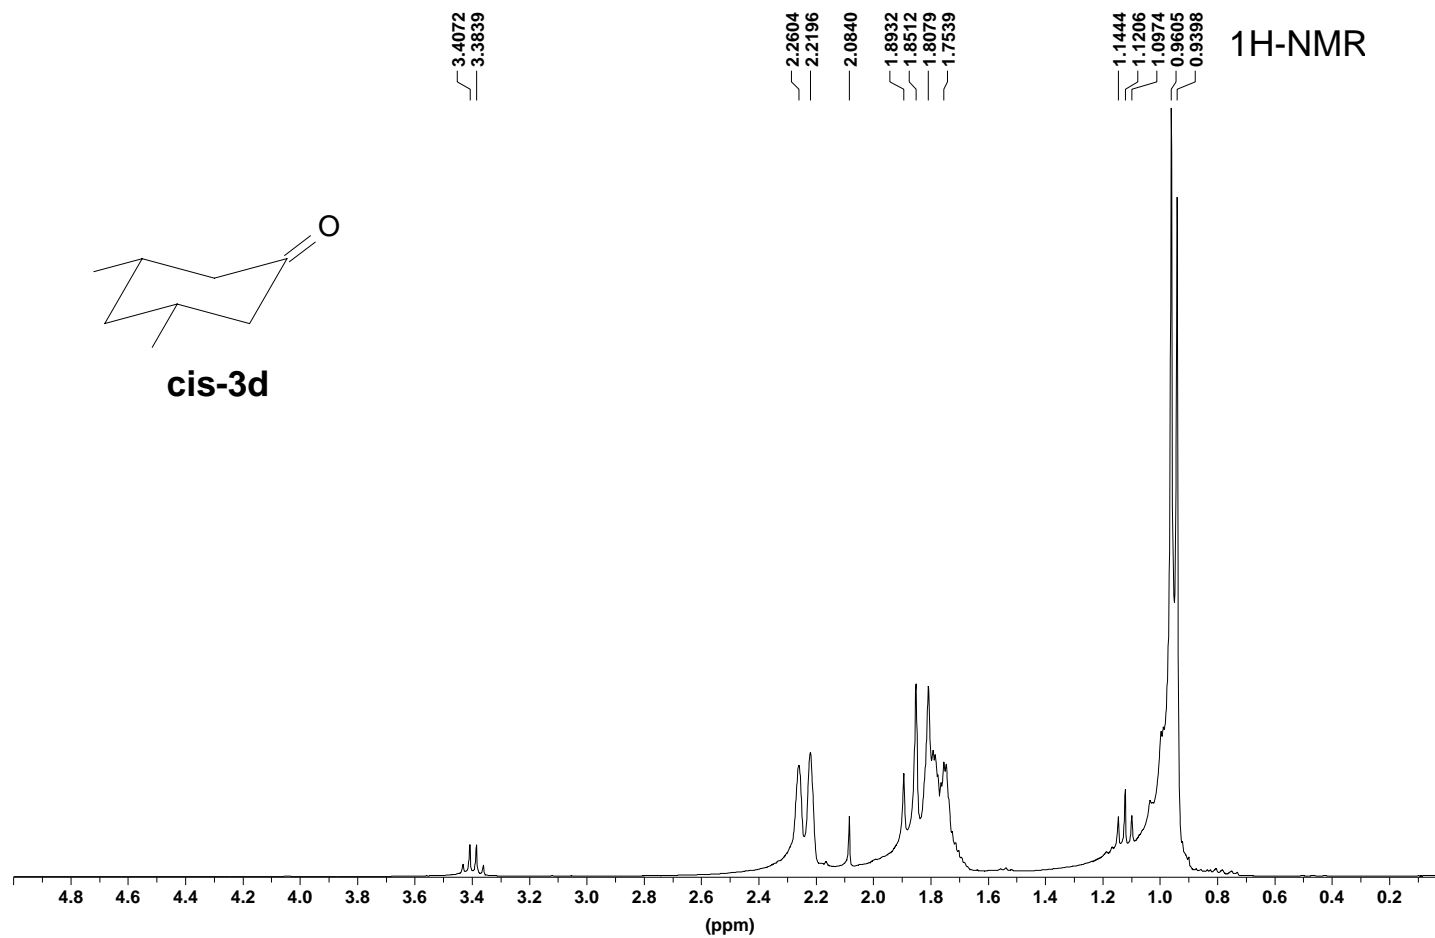

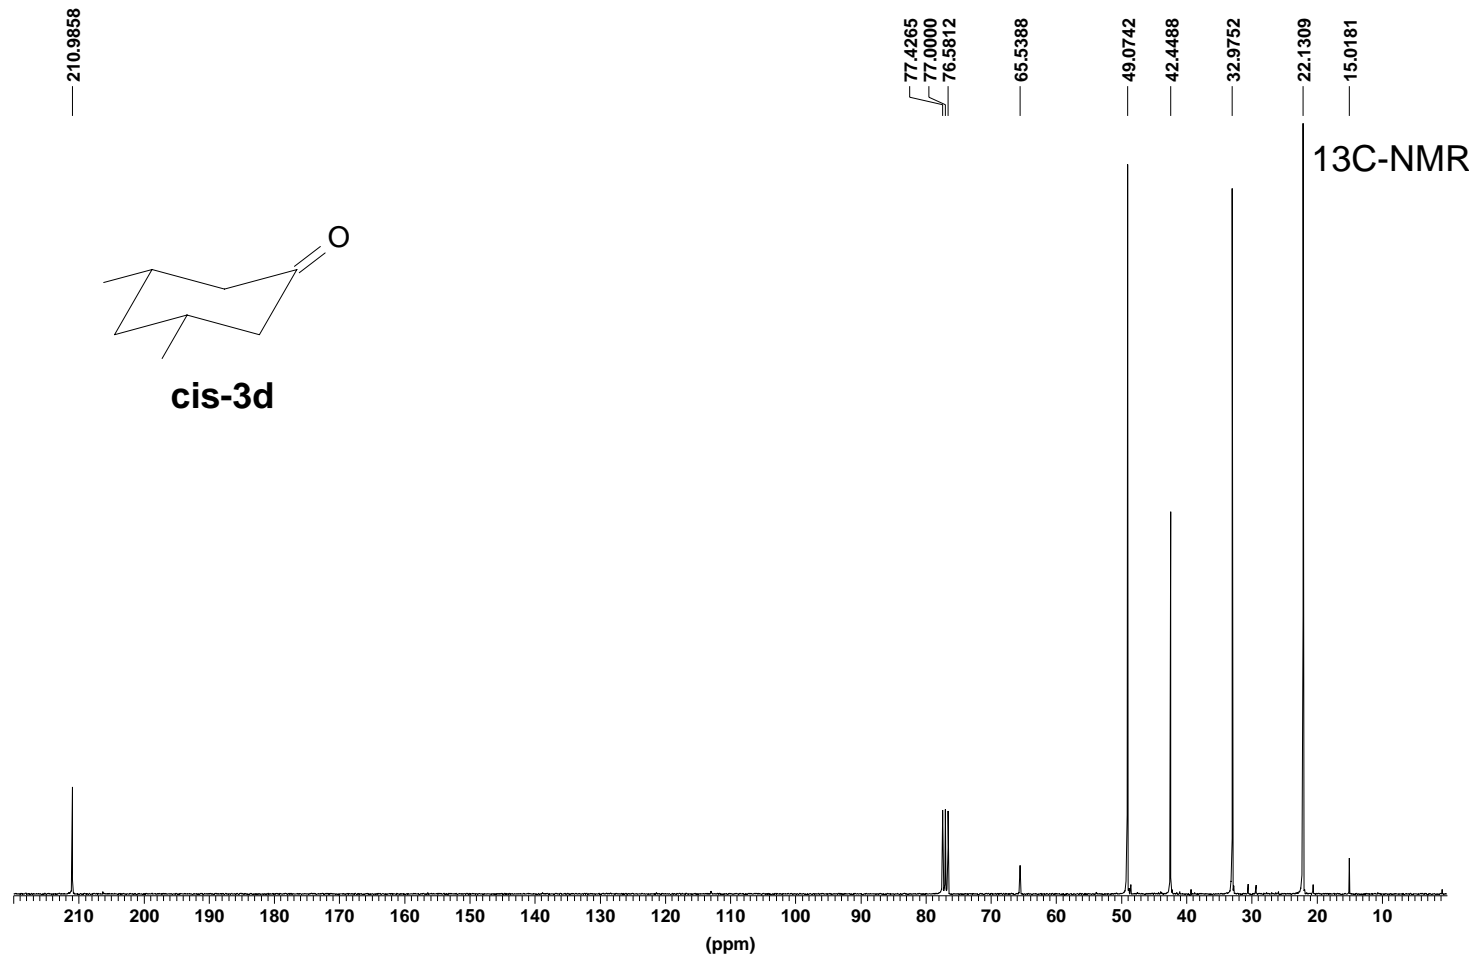

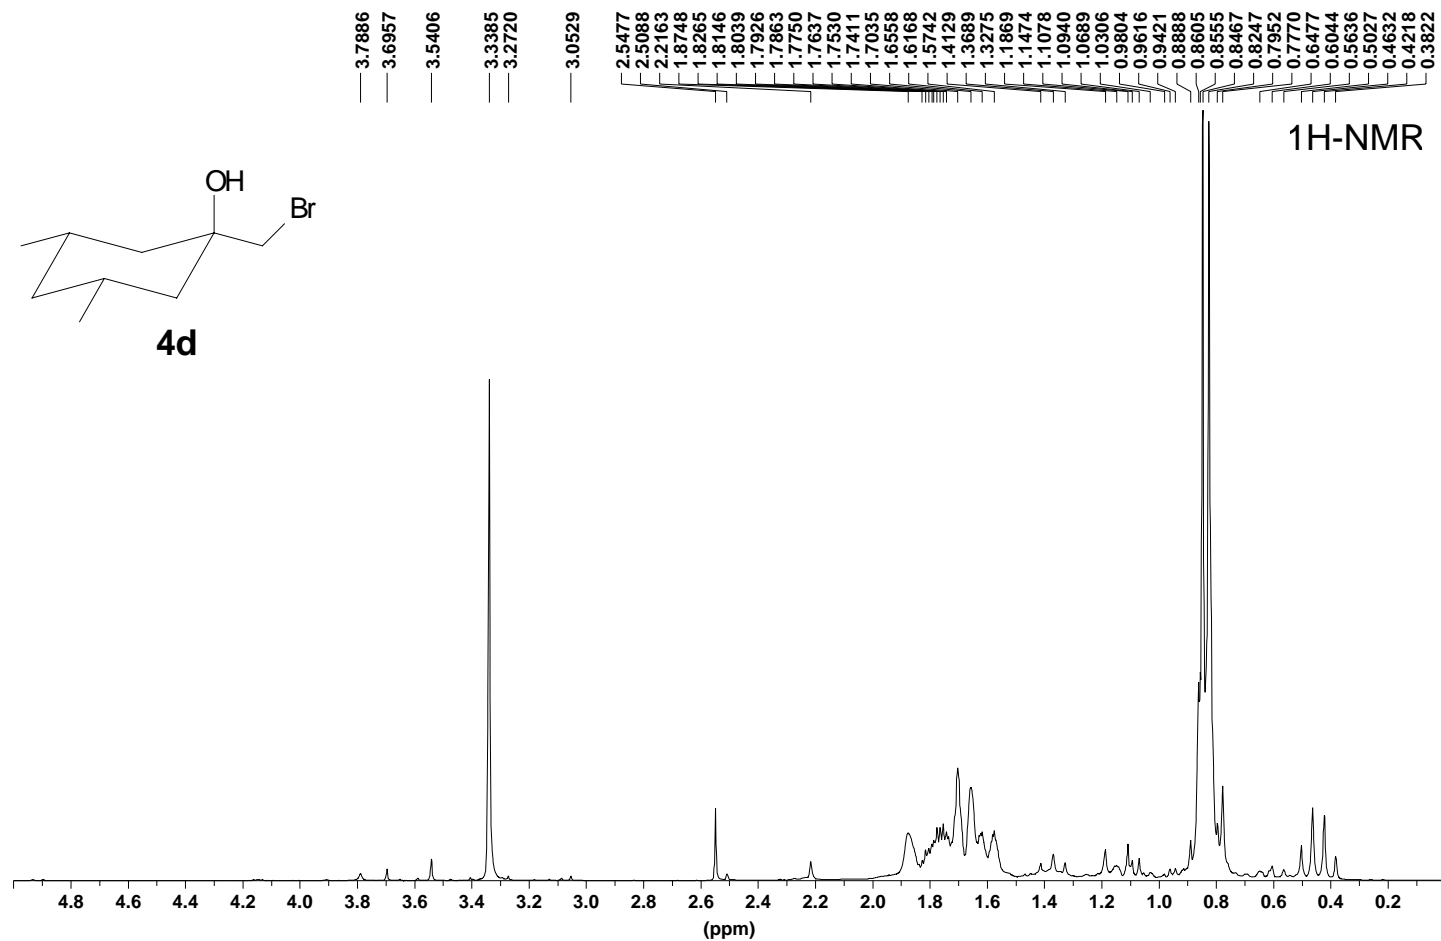

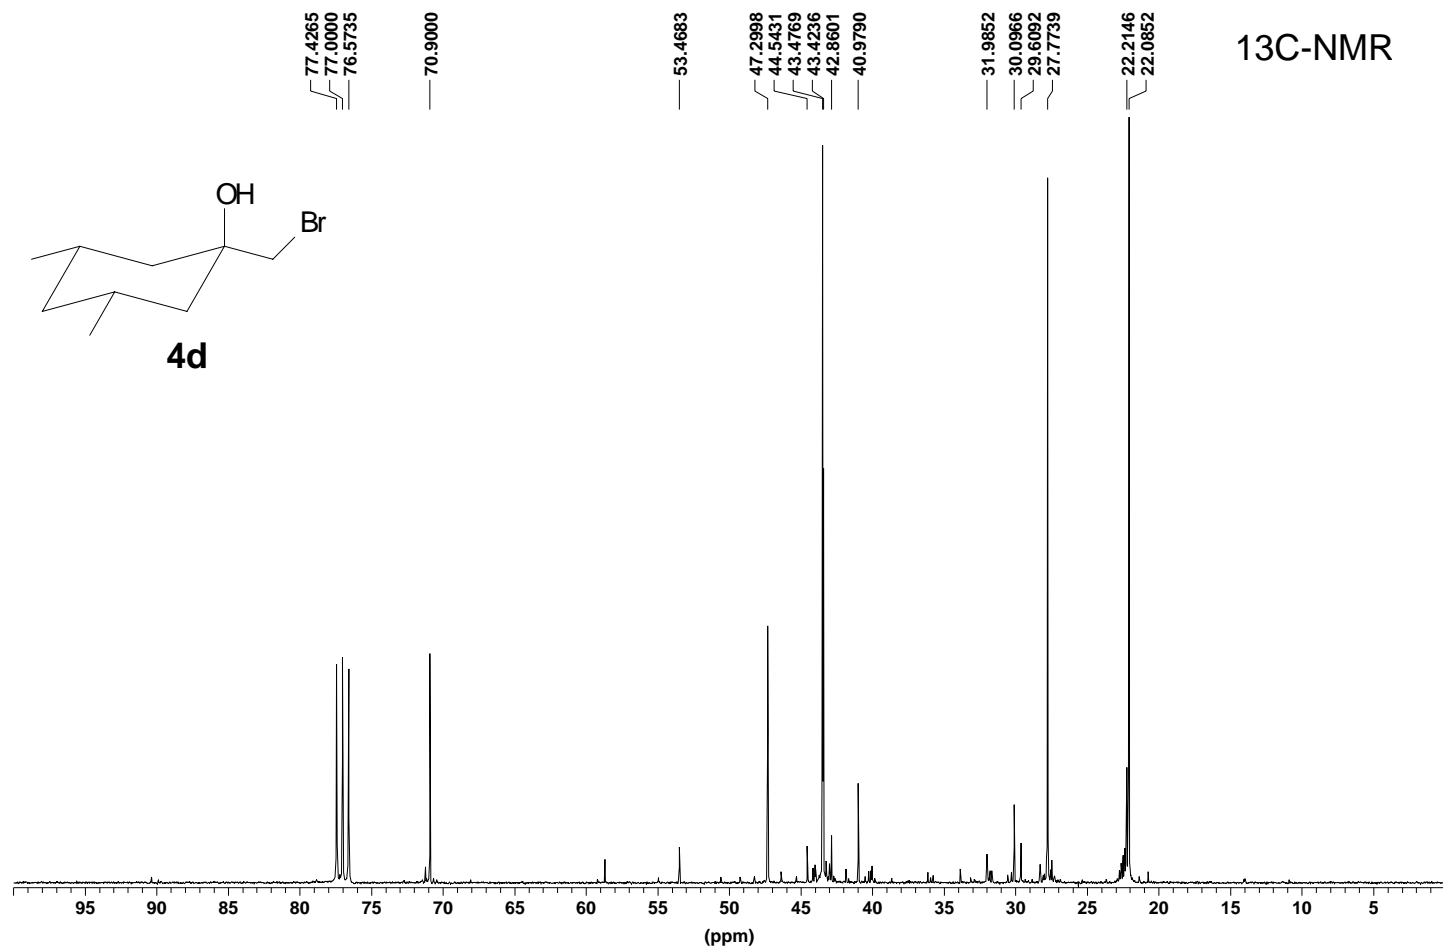

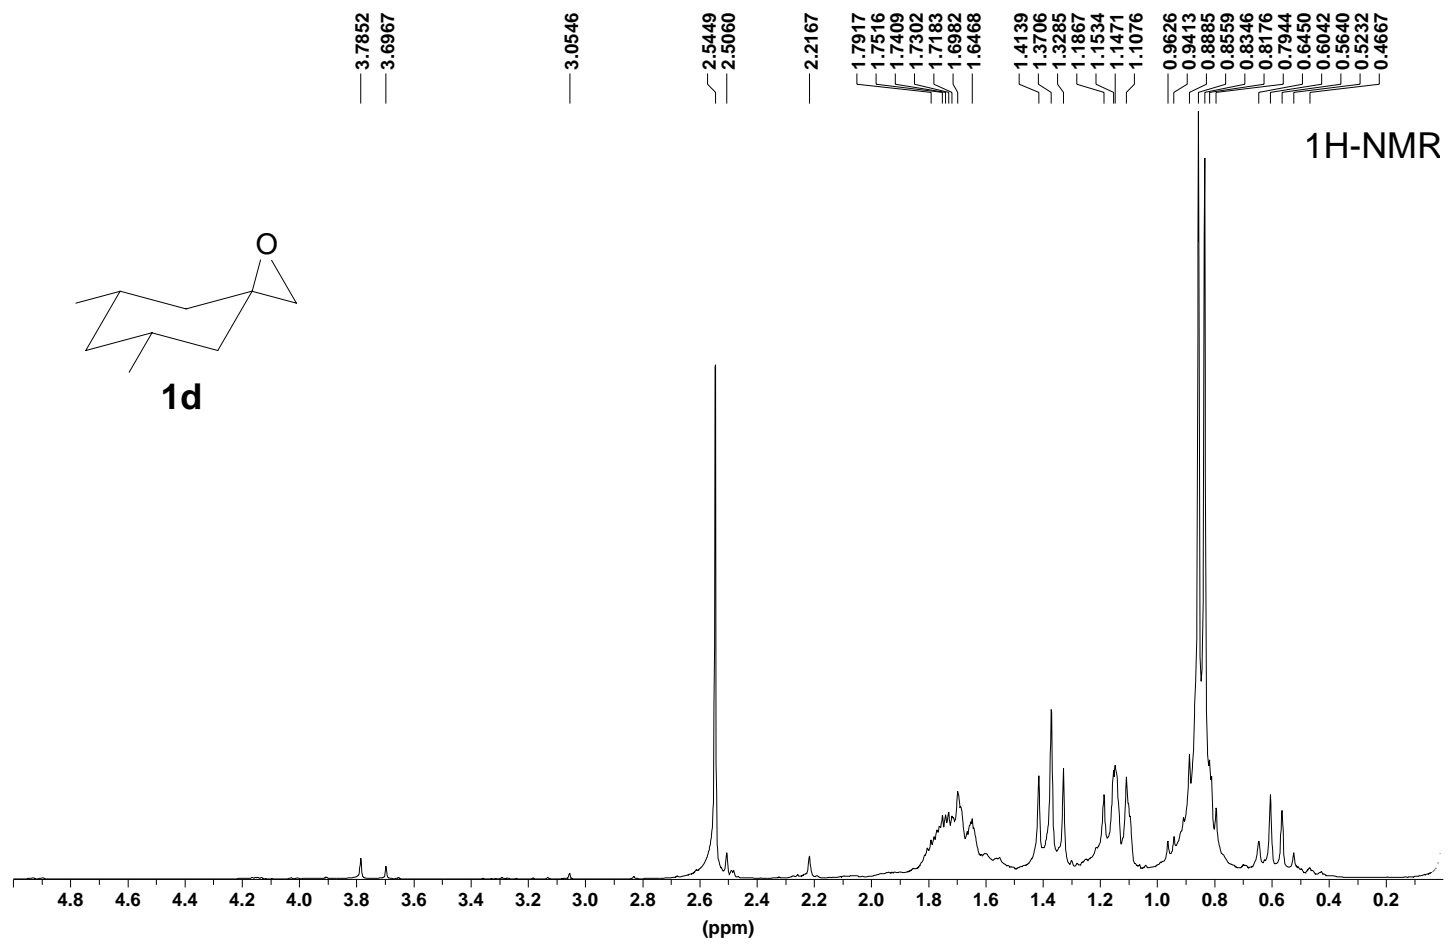



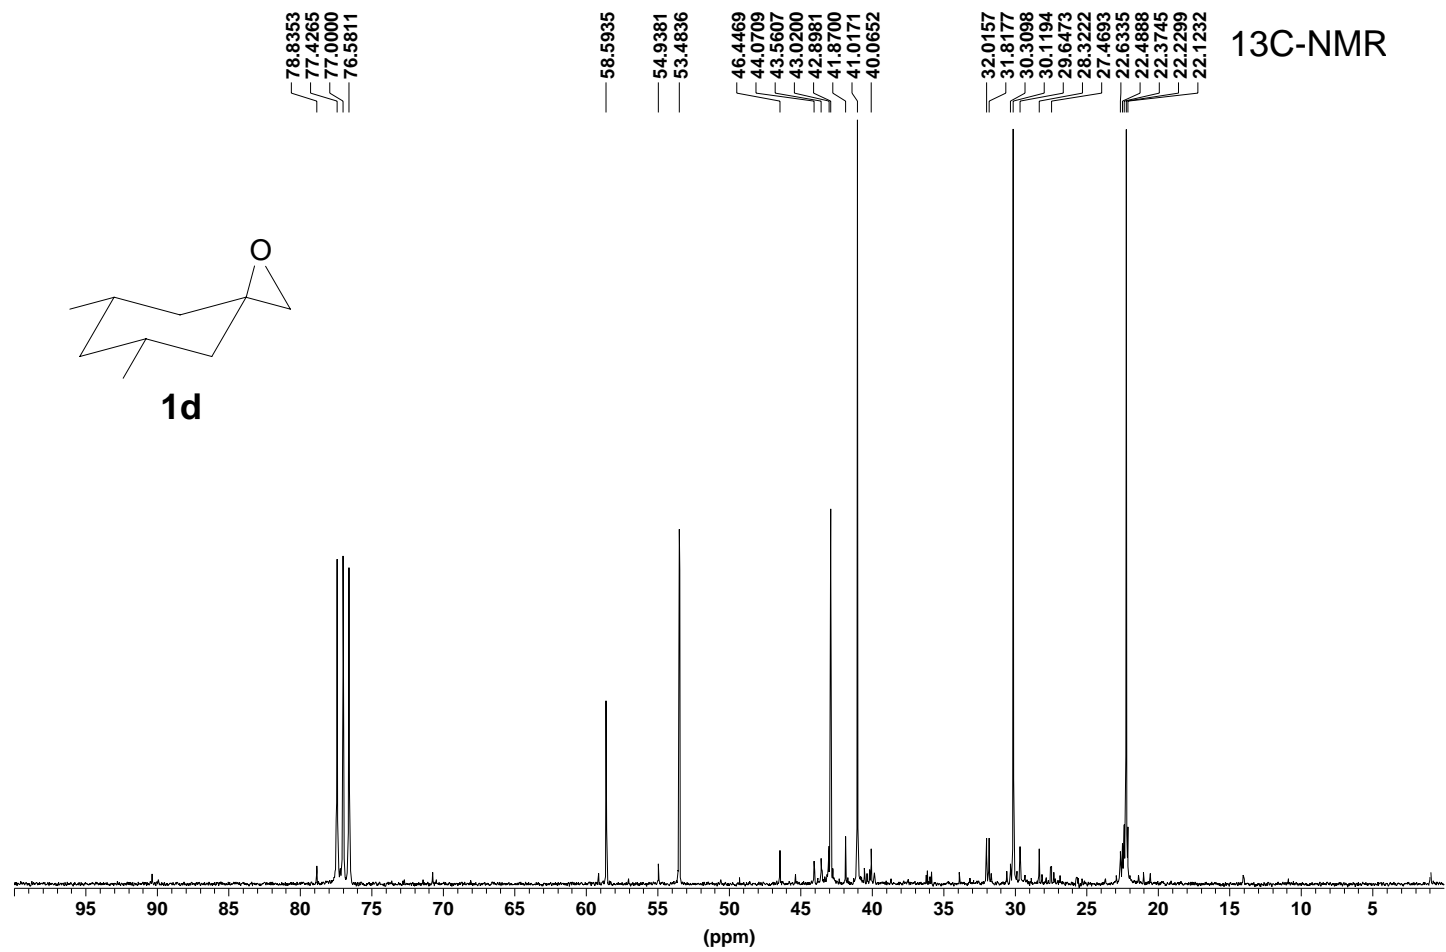

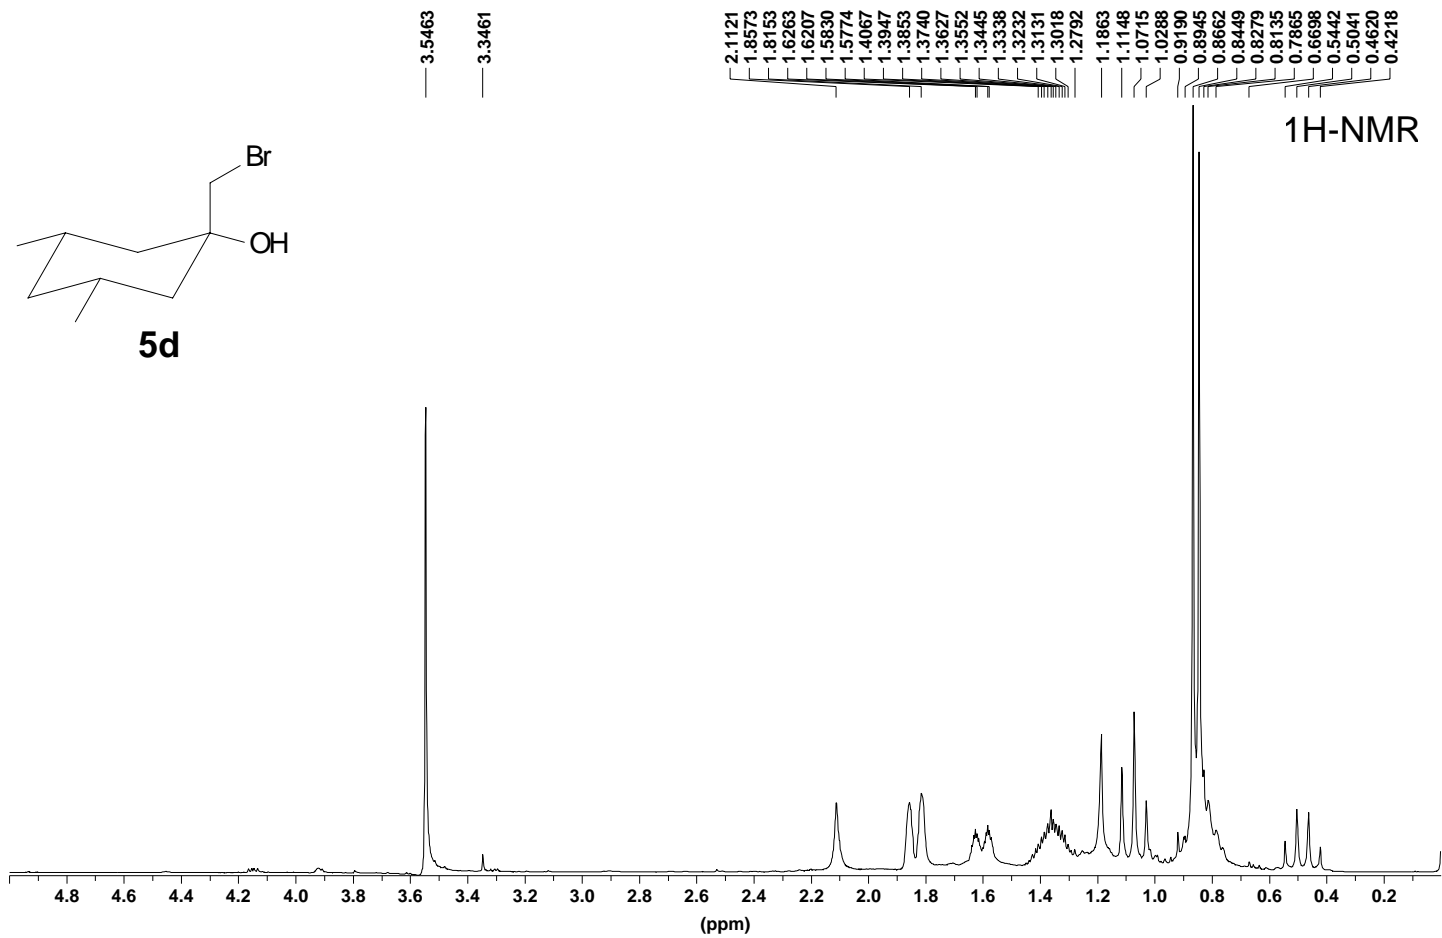

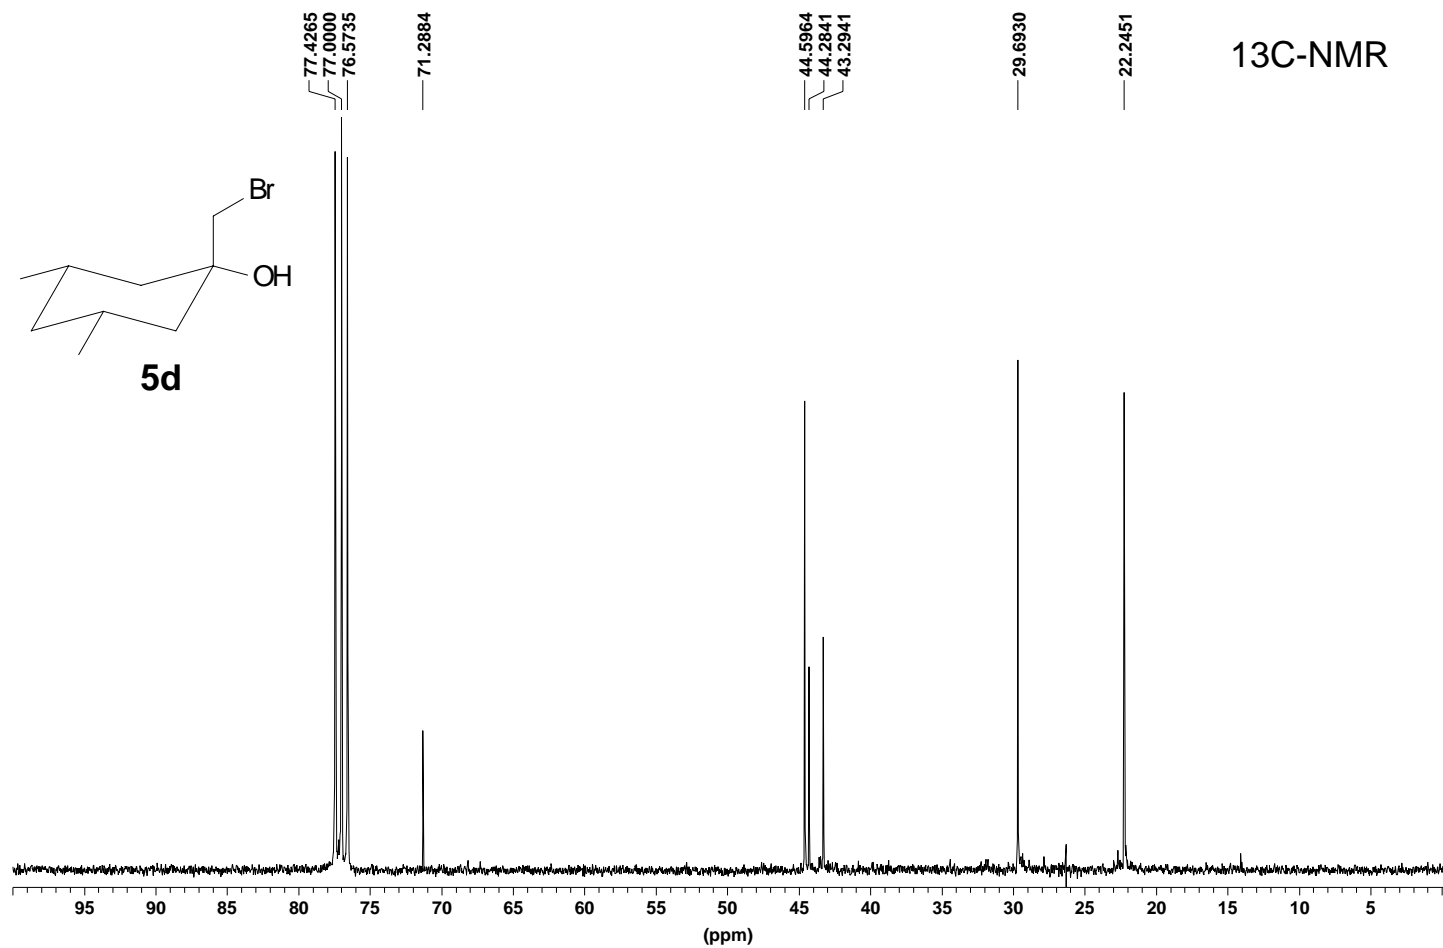

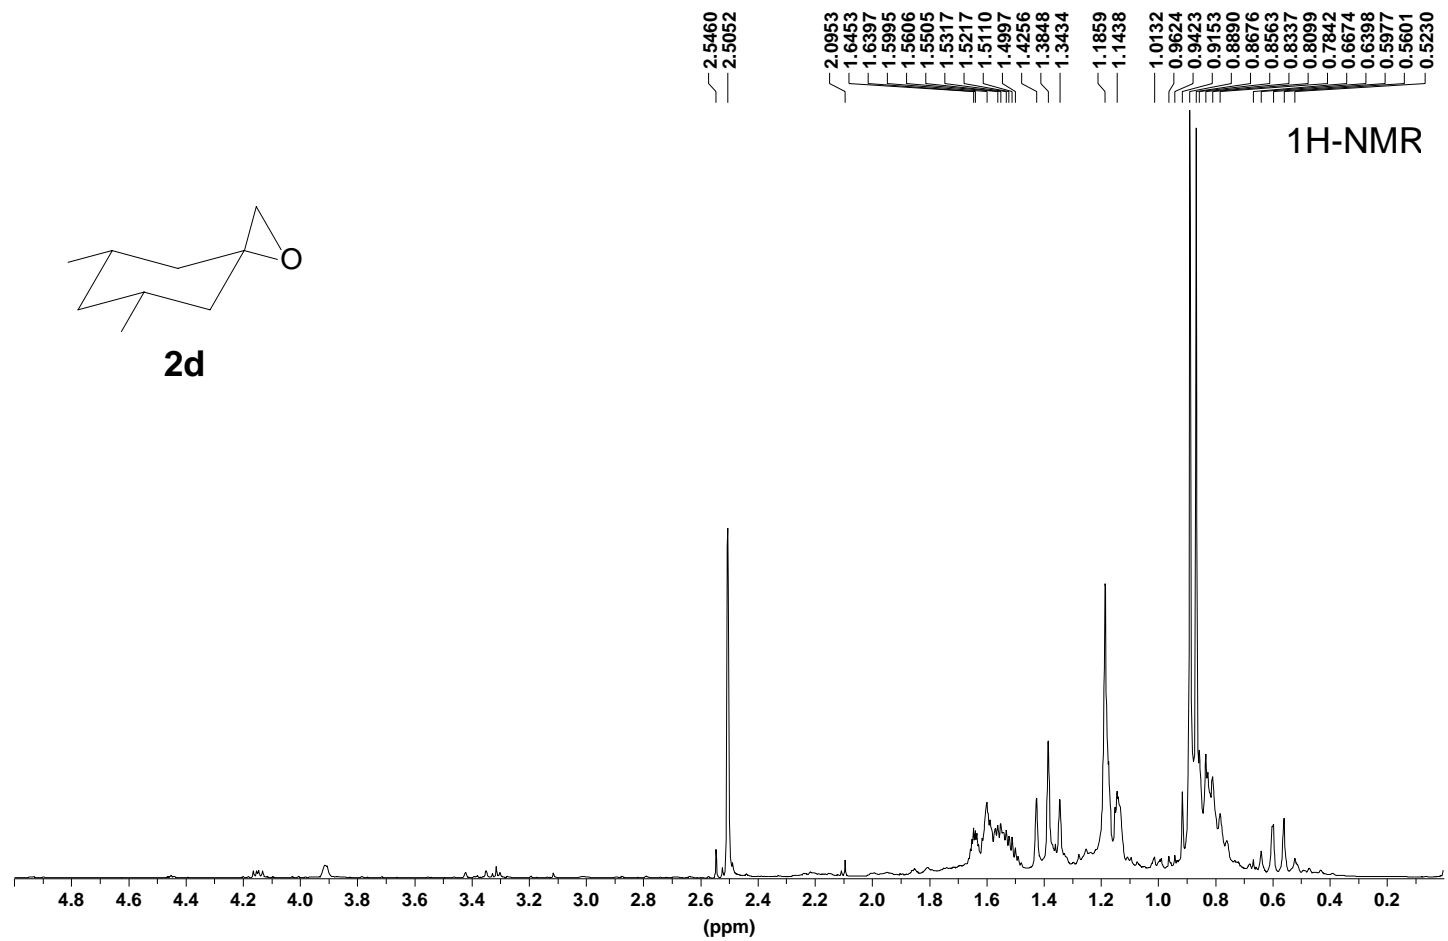

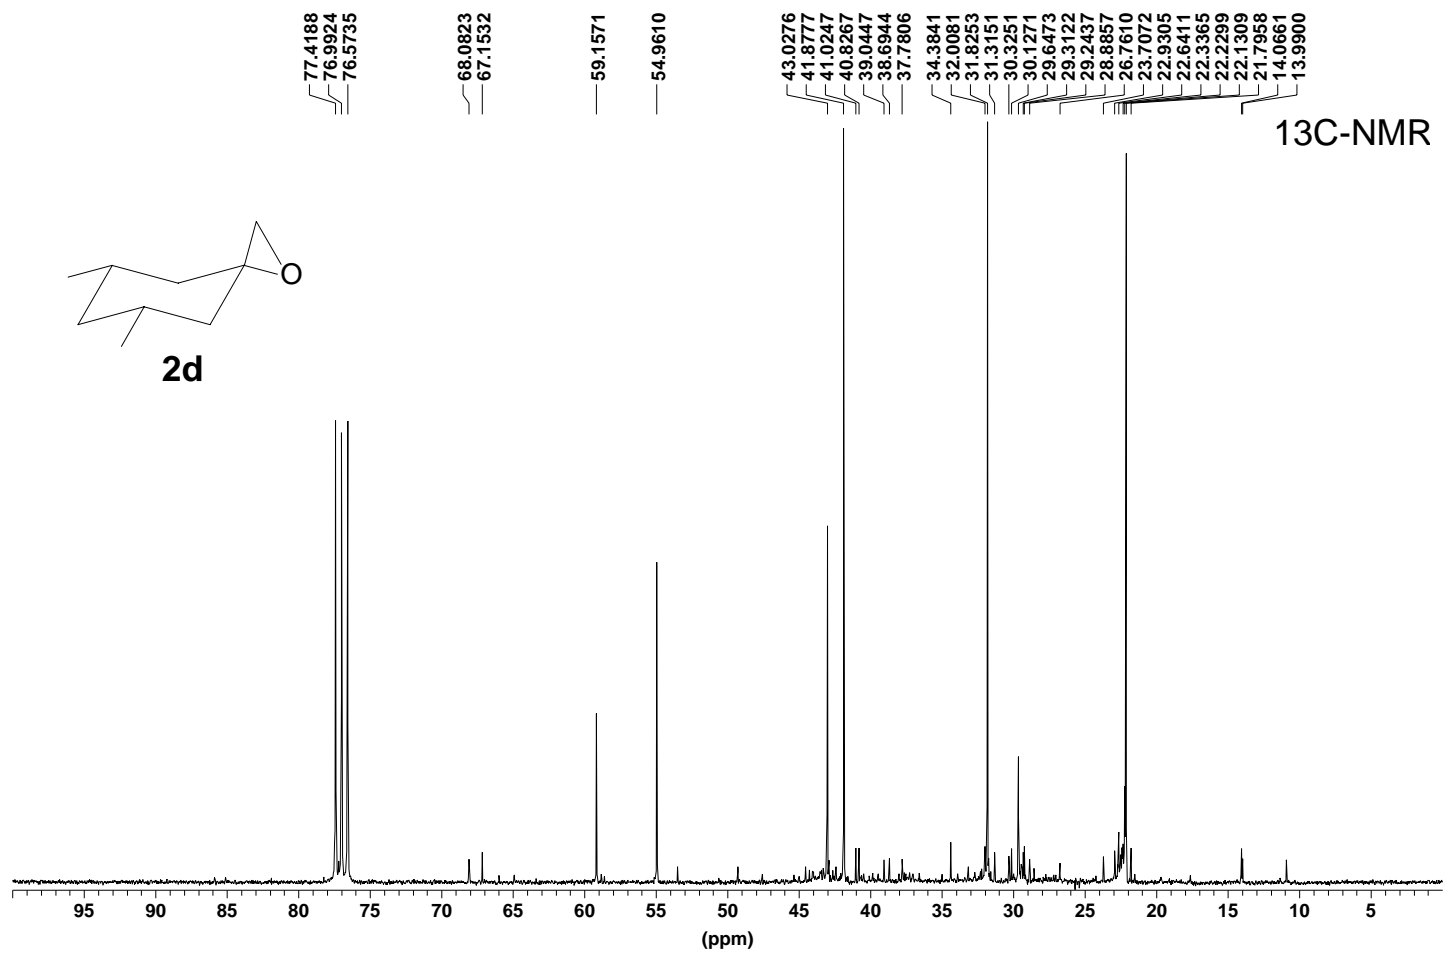

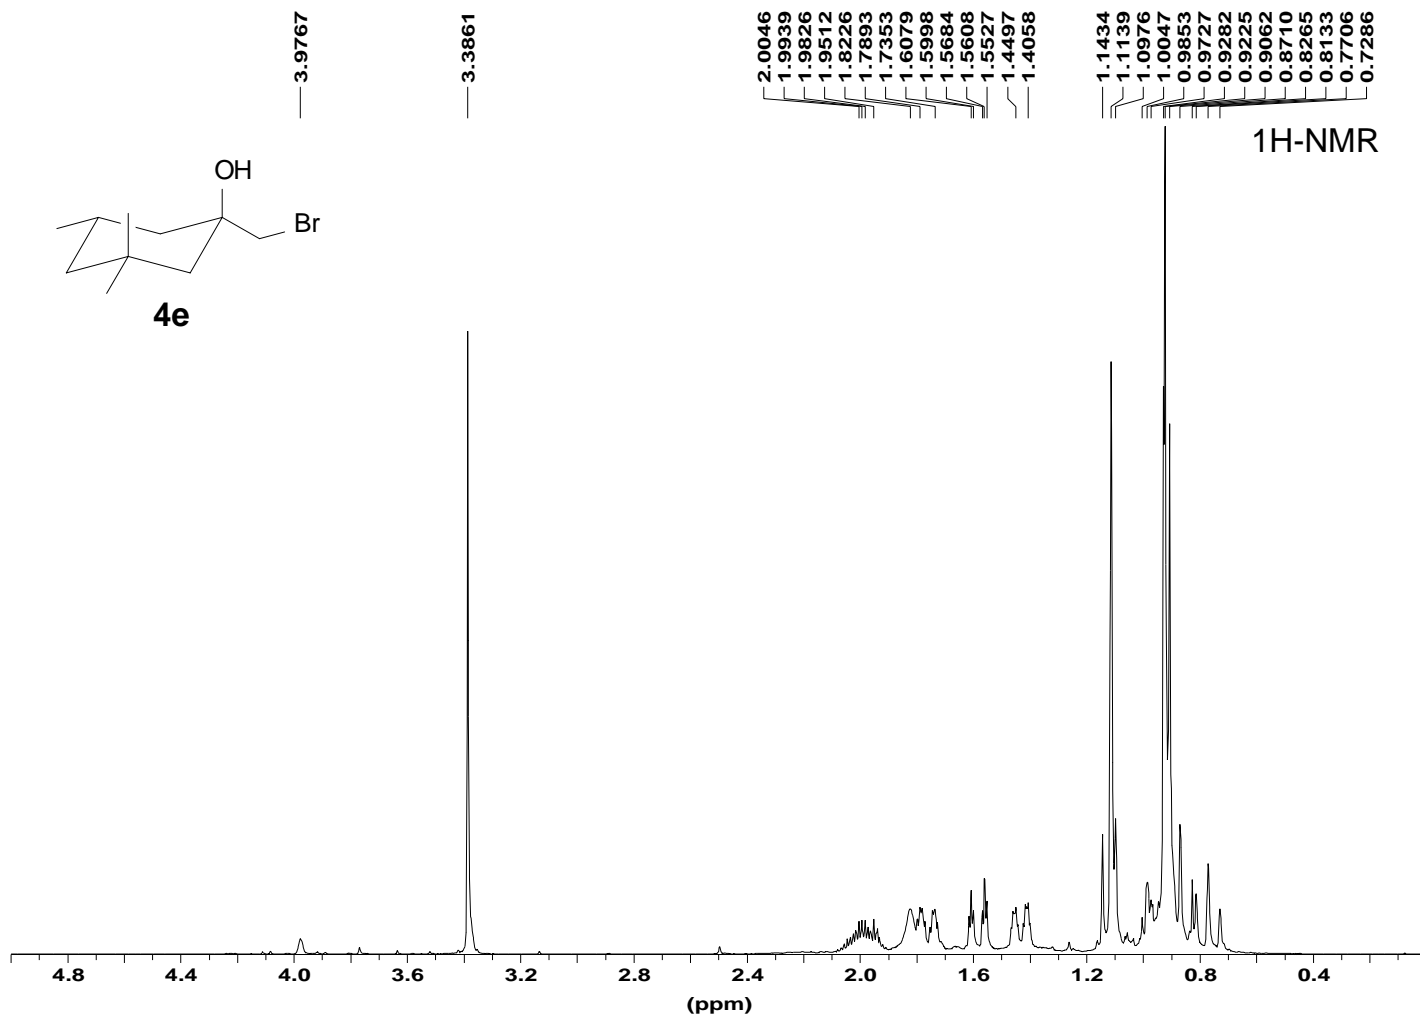

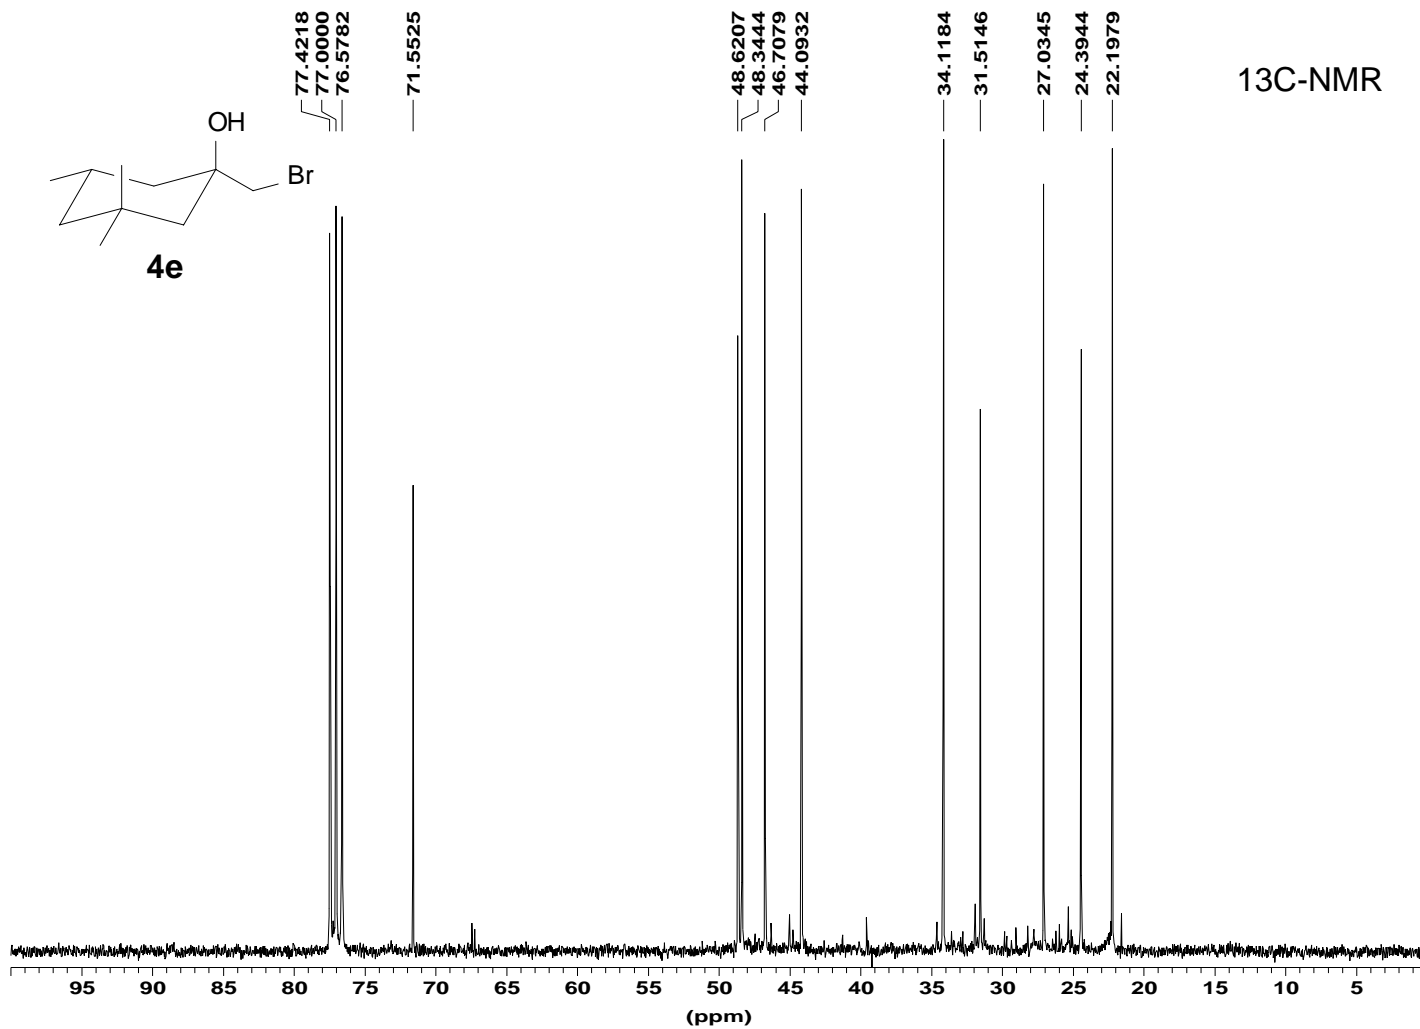

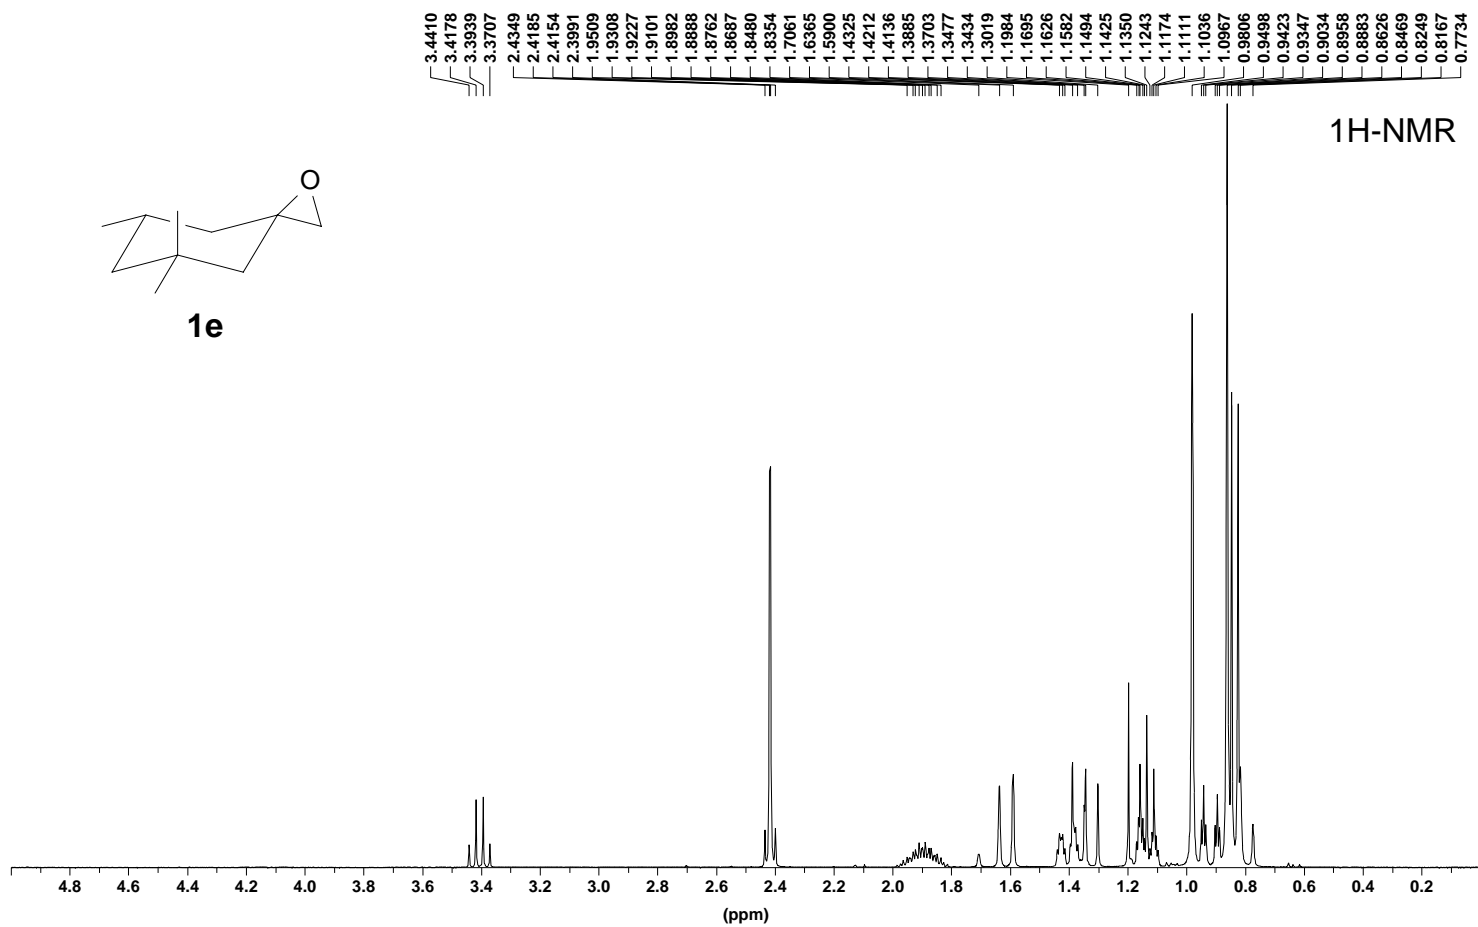



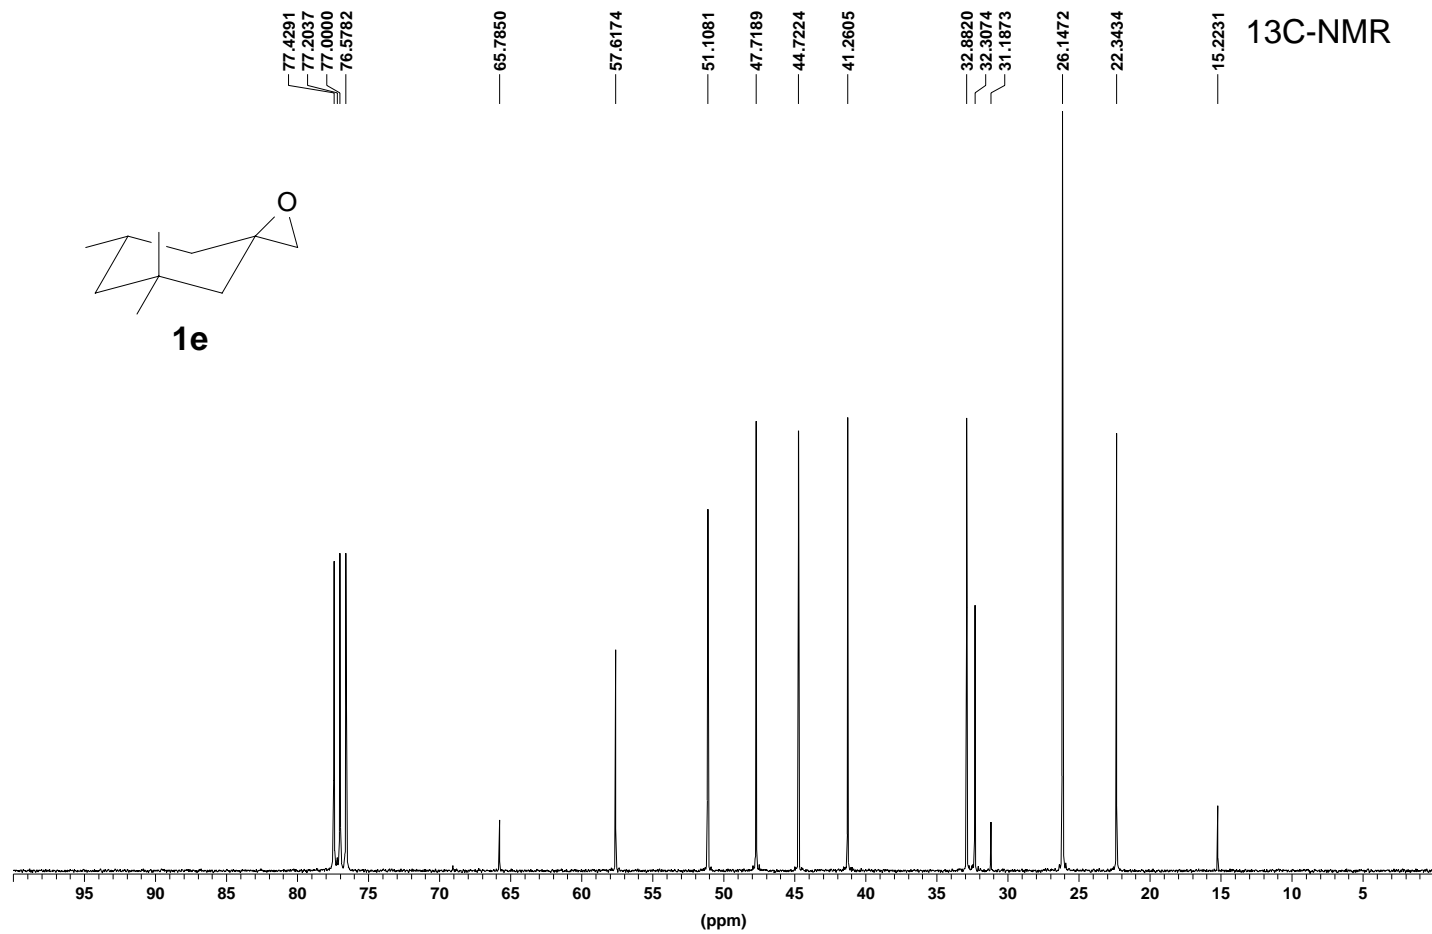

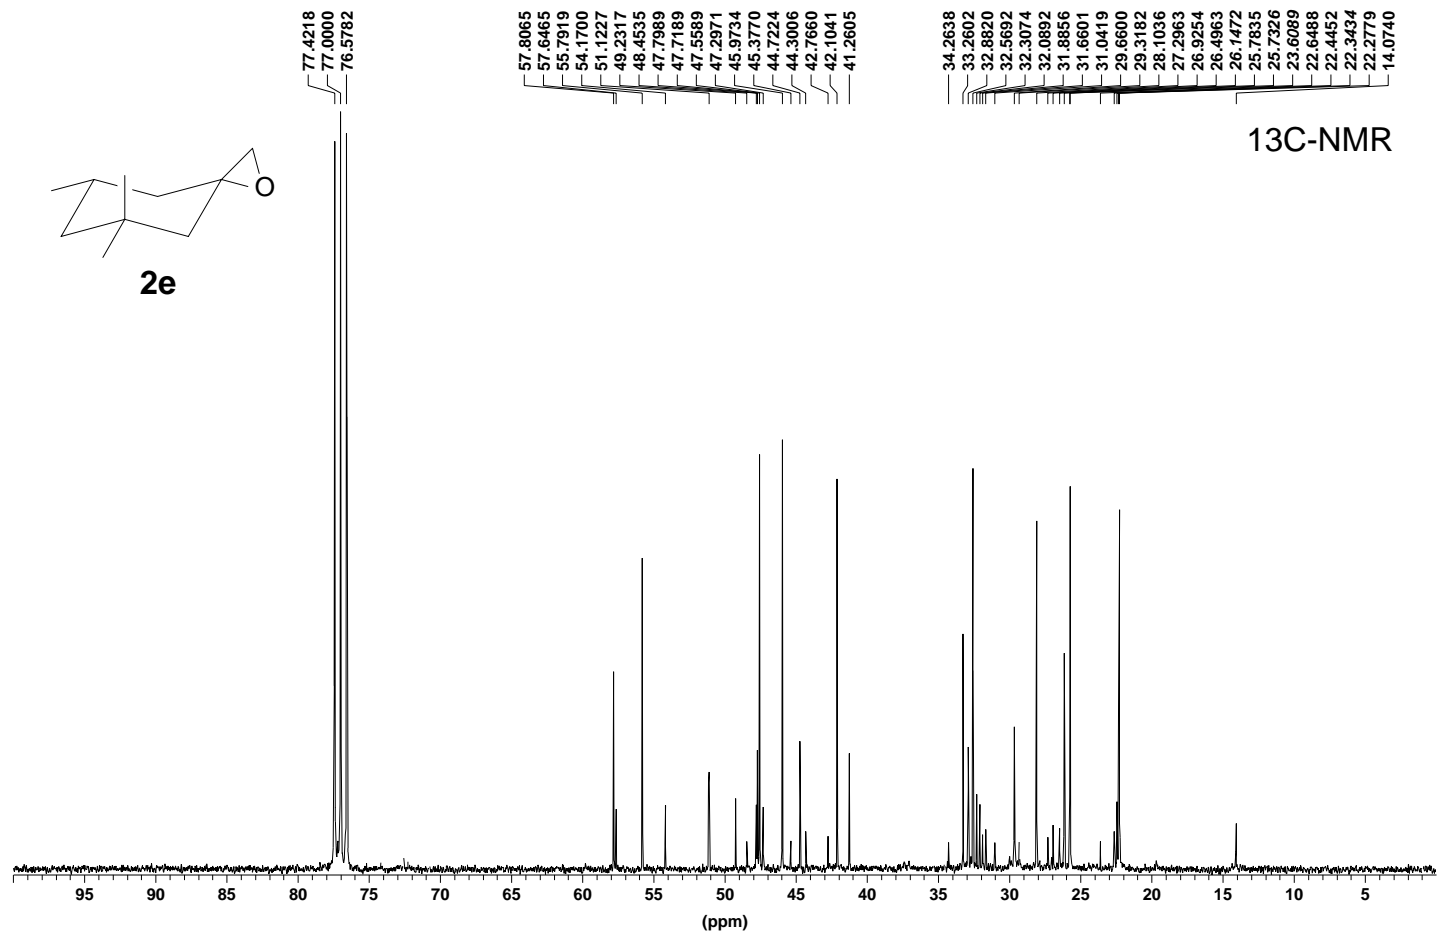

**TABLE S1** Gas chromatography using a  $\beta$ -DEX 120 fused silica cyclodextrin capillary column

| compound     | oven temperature | carrier gas    | $k^{\S}$                      | peak elution order                                                                                                                                         |
|--------------|------------------|----------------|-------------------------------|------------------------------------------------------------------------------------------------------------------------------------------------------------|
| <b>1a/2a</b> | 100 °C           | N <sub>2</sub> | 3.25                          | one peak                                                                                                                                                   |
| <b>1b/2b</b> | 100 °C           | N <sub>2</sub> | 3.90, 5.05                    | <b>1b, 2b</b>                                                                                                                                              |
| <b>1c/2c</b> | 120 °C           | H <sub>2</sub> | 3.55, 4.45                    | <b>1c, 2c</b>                                                                                                                                              |
| <b>1d/2d</b> | 100 °C           | N <sub>2</sub> | 4.25, 5.30                    | <b>1d, 2d</b>                                                                                                                                              |
| <b>1e/2e</b> | 100 °C           | N <sub>2</sub> | 3.76, 4.05,<br>5.14, 5.76     | (3 <i>S</i> ,7 <i>R</i> )- <b>1e</b> , (3 <i>R</i> ,7 <i>S</i> )- <b>1e</b><br>(3 <i>S</i> ,7 <i>S</i> )- <b>2e</b> , (3 <i>R</i> ,7 <i>R</i> )- <b>2e</b> |
| <b>3d</b>    | 70 °C            | H <sub>2</sub> | 8.05, 9.85                    | <i>cis</i> , <i>trans</i>                                                                                                                                  |
| <b>3e</b>    | 100 °C           | N <sub>2</sub> | 5.10, 5.35                    | (5 <i>S</i> ), (5 <i>R</i> )                                                                                                                               |
| <b>4b/5b</b> | 120 °C           | H <sub>2</sub> | 7.90, 8.10                    | <b>4b, 5b</b>                                                                                                                                              |
| <b>4c/5c</b> | 145 °C           | H <sub>2</sub> | 8.58, 11.00                   | <b>5c, 4c</b>                                                                                                                                              |
| <b>4d/5d</b> | 90 °C            | H <sub>2</sub> | 37.8, 39.5                    | <b>4d, 5d</b>                                                                                                                                              |
| <b>4e/5e</b> | 110 °C           | H <sub>2</sub> | 12.05, 12.42,<br>14.32, 15.00 | enantiomers- <b>4e</b> ,<br>enantiomers- <b>5e</b>                                                                                                         |
| <b>6e</b>    | 55 °C            | N <sub>2</sub> | 8.05, 8.45                    | enantiomers- <b>6e</b>                                                                                                                                     |

<sup>§</sup> Capacity factor  $k = (t_R - t_M) / t_M$   
 ( $t_R$  = retention time,  $t_M$  =  $t_R$  of mobile phase)
